# Supplementary material for: A computational study of the mechanism for water oxidation by (bpc)(bpy)RuIIOH2
Source: Royal Society of Chemistry journal article supplement (doi:10.1039/c4dt02113d), 2014-01-01
Supplement: c4dt02113d1.pdf [file c4dt02113d1.pdf]

## A Computational Study of the Mechanism for Water Oxidation by

### (bpc)(bpy)Ru<sup>II</sup>OH<sub>2</sub>

Ying Wang and Mårten S. G. Ahlquist\*

Division of Theoretical Chemistry & Biology, School of Biotechnology, KTH, Royal Institute of Technology, 106 91 Stockholm, Sweden.

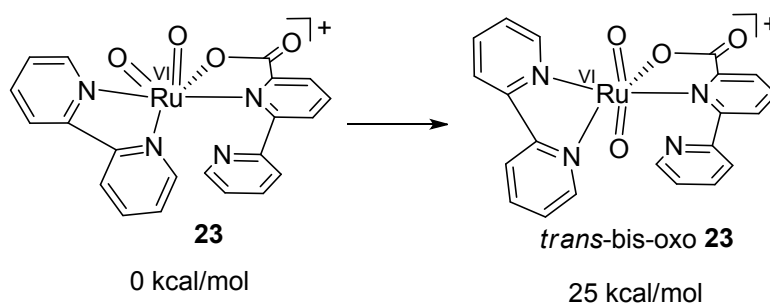

**Scheme S1.** Profile of the calculated relative G for the *cis*-bis-oxo and *trans*-bis-oxo of **23**.

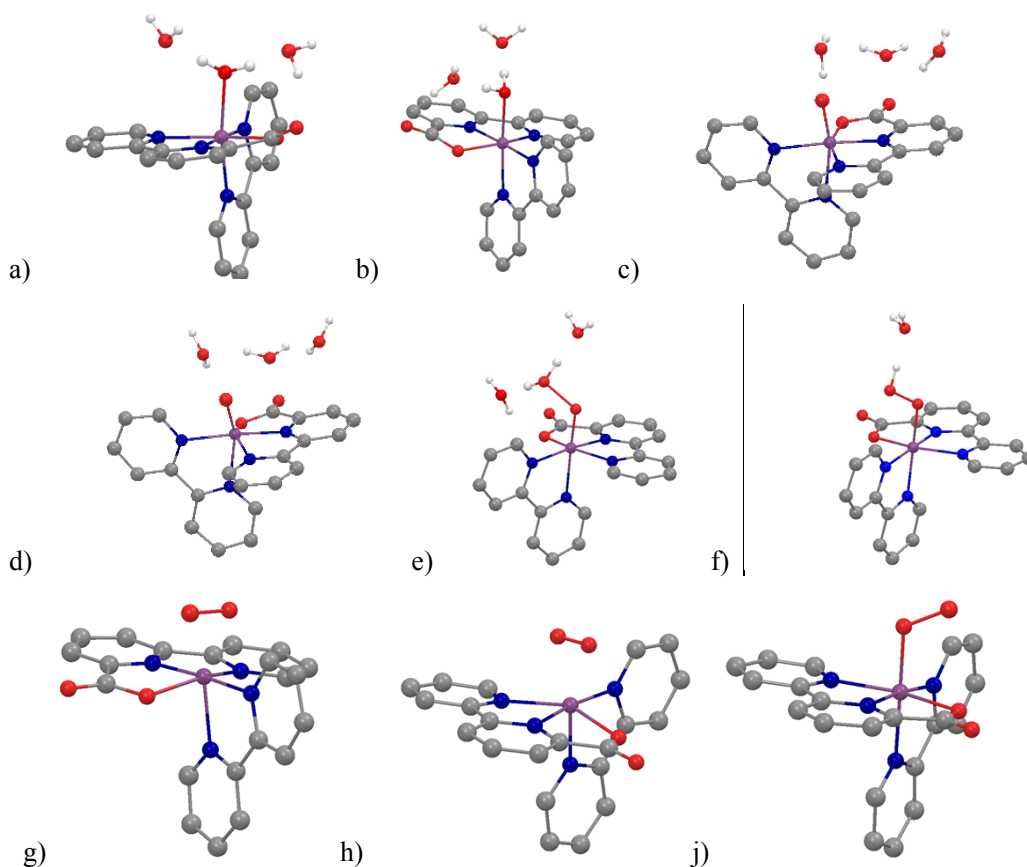

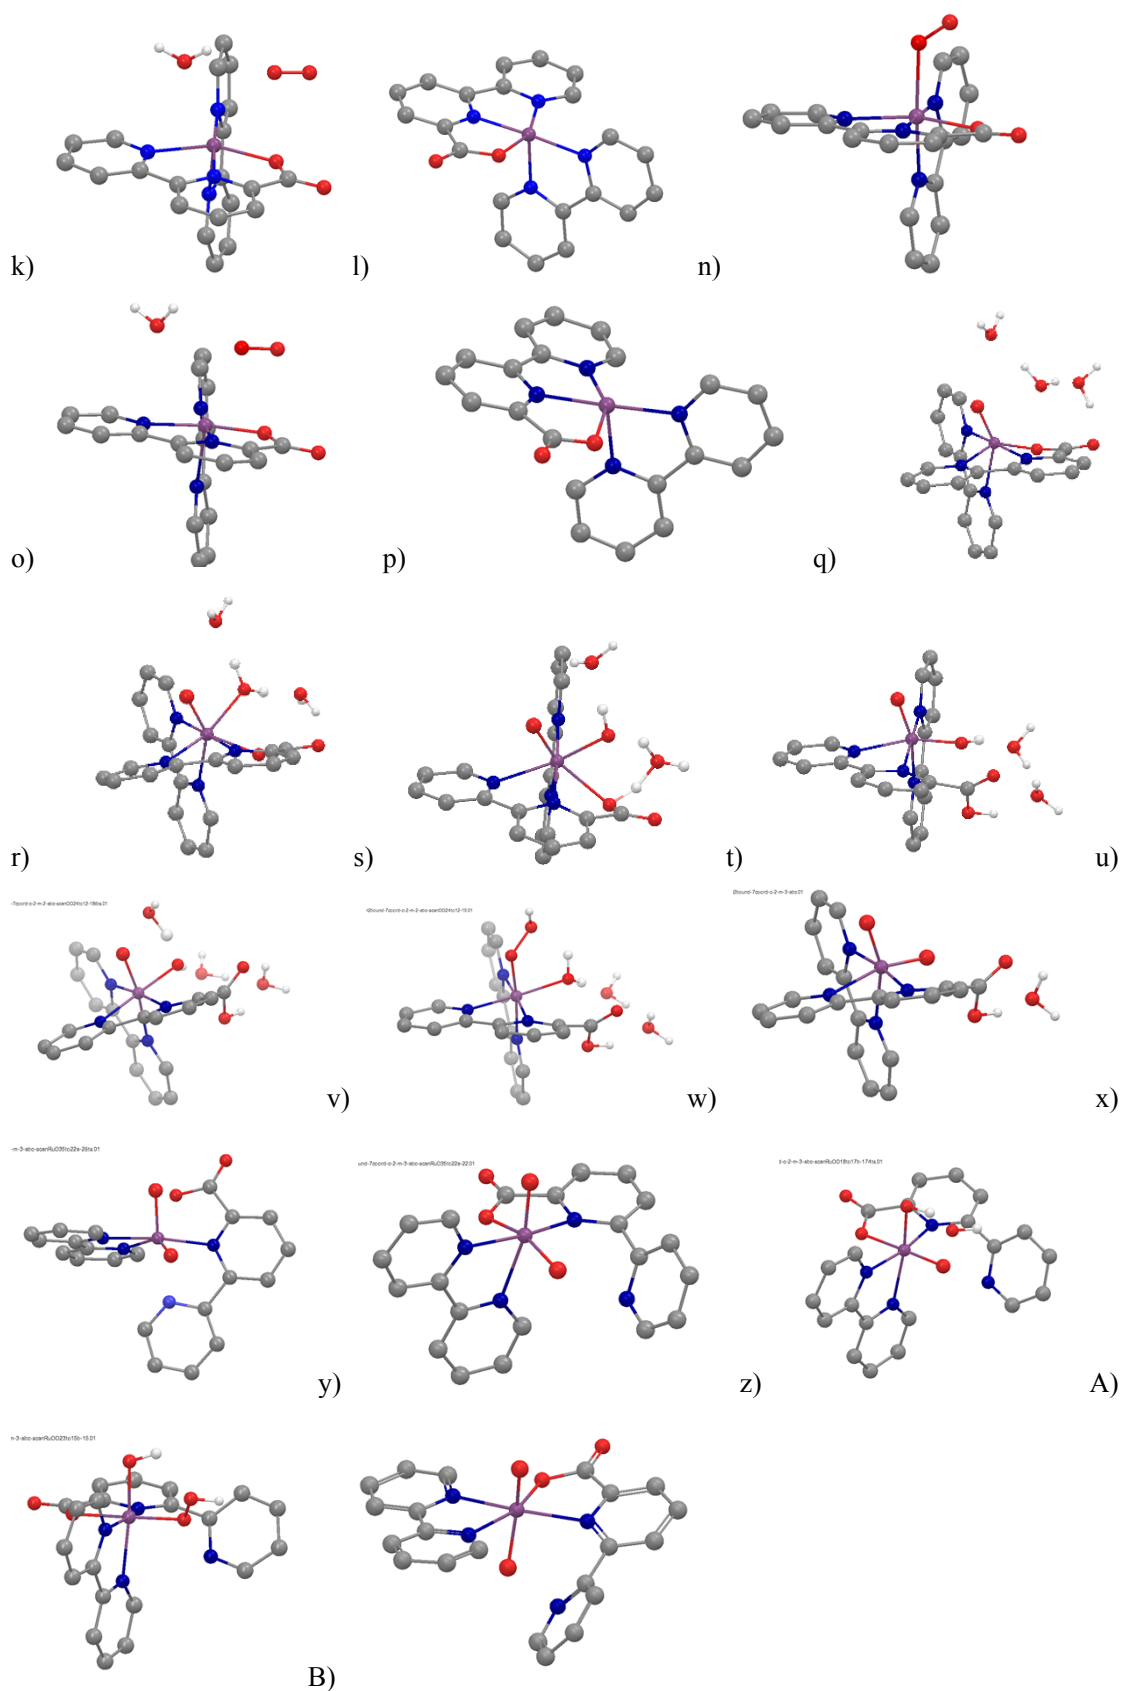

**Figure S1.** Optimized geometries of a) **1**; b) **2**; c) **3**; d) **4**; e) **ts5**; f) **6**; g) **7<sub>side-on</sub>**; h) **8<sub>side-on</sub>**; j) **9<sub>end-on</sub>**; k) **ts10**; l) **11**; n) **12<sub>end-on</sub>**; o) **ts13**; p) **14**; q) **ts15**; r) **16**; s) **ts17**; t) **18**; u) **ts19**; v) **20**; w) **21**; x) **ts22**; y) **23** z) **ts24**. A) **25**. B) *trans*-bis-oxo **23**. The hydrogen atoms except the HO type are omitted for

clarity. (Purple = Ru; Red = O; Blue = N; Grey = C; White = H).

**Cartesian coordinates in Å and energies in atomic units unless stated otherwise of the calculated geometries.**

**Figure S1a**

**E (M06/LACV3P\*\*++ 2f(Ru)) = -1501.30367241688**

**ZPE (kcal mol<sup>-1</sup>) = 251.959**

**G<sub>solv</sub> = -0.0864438**

**DH<sub>298</sub> (kcal mol<sup>-1</sup>) = 19.151**

**DS<sub>298</sub> (cal K<sup>-1</sup> mol<sup>-1</sup>) = 193.271**

Cartesian coordinates

| atom | x             | y            | z             |
|------|---------------|--------------|---------------|
| Ru1  | 3.4570286793  | 5.9941720223 | 1.7118276224  |
| N2   | 2.4764436111  | 5.0323675762 | 3.2577943631  |
| C3   | 3.0536477240  | 4.5892031544 | 4.3922077288  |
| H4   | 4.1135289868  | 4.7875979396 | 4.4942303503  |
| C5   | 2.3493173324  | 3.9101451247 | 5.3772576996  |
| H6   | 2.8642911353  | 3.5735665309 | 6.2704848957  |
| C7   | 0.9884750546  | 3.6717294041 | 5.1867872515  |
| H8   | 0.4076273014  | 3.1413242215 | 5.9342429554  |
| C9   | 0.3852326402  | 4.1234511583 | 4.0181495735  |
| H10  | -0.6699883641 | 3.9459116849 | 3.8504565938  |
| C11  | 1.1439266131  | 4.8036740913 | 3.0601522341  |
| C12  | 0.5914009402  | 5.3203418283 | 1.7941831212  |
| C13  | -0.7433813401 | 5.1800682448 | 1.4018843739  |
| H14  | -1.4507995510 | 4.6603165374 | 2.0369010539  |
| C15  | -1.1604077424 | 5.7084081491 | 0.1844753368  |
| H16  | -2.1933555258 | 5.6023903612 | -0.1306331591 |
| C17  | -0.2316746472 | 6.3692278478 | -0.6215602818 |
| H18  | -0.5145729106 | 6.7919977531 | -1.5792278608 |
| C19  | 1.0815603536  | 6.4765738005 | -0.1791462544 |
| H20  | 1.8568599768  | 6.9669464682 | -0.7577235832 |
| N21  | 1.4873498101  | 5.9674918570 | 1.0003519180  |
| N22  | 5.3143079709  | 5.9085891702 | 2.4411430071  |
| C23  | 6.0792875493  | 4.8763104791 | 2.0448168593  |
| C24  | 7.3899621467  | 4.7610325837 | 2.4967912657  |
| H25  | 7.9971611347  | 3.9328243964 | 2.1493441833  |
| C26  | 7.8755866069  | 5.7370908740 | 3.3742905699  |
| H27  | 8.8890818277  | 5.6694001630 | 3.7571810744  |
| C28  | 7.0721766904  | 6.8201264942 | 3.7420228133  |
| H29  | 7.4648586908  | 7.5903555581 | 4.3960620766  |
| C30  | 5.7679400494  | 6.8982207074 | 3.2422548519  |
| C31  | 4.7706839581  | 7.9682041821 | 3.4589118213  |
| C32  | 4.9982252813  | 9.0851625118 | 4.2648788824  |

|     |              |               |               |
|-----|--------------|---------------|---------------|
| H33 | 5.9462933268 | 9.1959547602  | 4.7792302104  |
| C34 | 4.0068738114 | 10.0520050541 | 4.4057804057  |
| H35 | 4.1754034279 | 10.9223296830 | 5.0318811623  |
| C36 | 2.7990057490 | 9.8816317924  | 3.7299875551  |
| H37 | 1.9987019950 | 10.6093972505 | 3.8096786946  |
| C38 | 2.6264445565 | 8.7495666725  | 2.9407519956  |
| H39 | 1.7055095152 | 8.5731172656  | 2.3960631080  |
| N40 | 3.5759870835 | 7.8062870875  | 2.7992083030  |
| C41 | 5.4053826291 | 3.9900857713  | 0.9998323251  |
| O42 | 4.1311032417 | 4.1713928715  | 0.8482771284  |
| O43 | 6.1212725476 | 3.2568313161  | 0.3104931464  |
| O44 | 4.1746123335 | 6.8475801820  | -0.1610863076 |
| H45 | 4.8750773181 | 7.5340202452  | -0.0782328151 |
| H46 | 4.5635830693 | 6.1334006325  | -0.7428712588 |
| O54 | 6.2500649361 | 8.6125958443  | 0.0365759557  |
| H55 | 6.9967311647 | 8.2312876762  | -0.4453840669 |
| H56 | 6.1156536853 | 9.4838351208  | -0.3594671894 |
| O50 | 5.3514635932 | 5.0456808456  | -1.7946127094 |
| H51 | 5.6780689449 | 4.2827189371  | -1.2730081669 |
| H52 | 4.7038069391 | 4.6611383273  | -2.3993059294 |

**Figure S1b**

**E (M06/LACV3P\*\*++ 2f(Ru)) = -1500.97786853401**

**ZPE (kcal mol<sup>-1</sup>) = 252.318**

**G<sub>solv</sub> = -0.2281864**

**DH<sub>298</sub> (kcal mol<sup>-1</sup>) = 19.088**

**DS<sub>298</sub> (cal K<sup>-1</sup> mol<sup>-1</sup>) = 191.916**

Cartesian coordinates

| atom | x             | y            | z             |
|------|---------------|--------------|---------------|
| Ru1  | 3.4550806617  | 6.0162643348 | 1.7067174656  |
| N2   | 2.4321953179  | 5.0953045818 | 3.2712167897  |
| C3   | 2.9933697806  | 4.7040907638 | 4.4299994164  |
| H4   | 4.0392786574  | 4.9507331048 | 4.5670607298  |
| C5   | 2.2810495953  | 4.0123625143 | 5.4017048567  |
| H6   | 2.7734819921  | 3.7138841979 | 6.3206814256  |
| C7   | 0.9406292678  | 3.7114838253 | 5.1614608248  |
| H8   | 0.3560582544  | 3.1676661747 | 5.8965230736  |
| C9   | 0.3582940109  | 4.1145134886 | 3.9628069776  |
| H10  | -0.6809376884 | 3.8849698525 | 3.7628331849  |
| C11  | 1.1228264740  | 4.8086817090 | 3.0212593472  |
| C12  | 0.6028152522  | 5.2811143992 | 1.7247590009  |
| C13  | -0.7054335662 | 5.0845234156 | 1.2798905051  |
| H14  | -1.4211550382 | 4.5472643752 | 1.8901715839  |
| C15  | -1.0882297445 | 5.5808528765 | 0.0349633865  |
| H16  | -2.1025594679 | 5.4294324051 | -0.3202518994 |

|     |               |               |               |
|-----|---------------|---------------|---------------|
| C17 | -0.1575807564 | 6.2682315799  | -0.7452638297 |
| H18 | -0.4200749317 | 6.6682761494  | -1.7180825836 |
| C19 | 1.1328482888  | 6.4306256736  | -0.2540303118 |
| H20 | 1.9068765527  | 6.9469622376  | -0.8105242272 |
| N21 | 1.5014583152  | 5.9502600975  | 0.9497189775  |
| N22 | 5.3617056381  | 5.9426969350  | 2.4164052367  |
| C23 | 6.0937091872  | 4.8914972817  | 2.0203141570  |
| C24 | 7.4291190401  | 4.7797596759  | 2.3904177741  |
| H25 | 8.0127263520  | 3.9300203289  | 2.0532951731  |
| C26 | 7.9662694326  | 5.7899570836  | 3.1983409067  |
| H27 | 9.0015236060  | 5.7326289742  | 3.5198623316  |
| C28 | 7.1838620485  | 6.8804111622  | 3.5912235808  |
| H29 | 7.6117038356  | 7.6614545153  | 4.2095108020  |
| C30 | 5.8503818224  | 6.9454026374  | 3.1705132096  |
| C31 | 4.8508078760  | 7.9988461842  | 3.4493178691  |
| C32 | 5.1012057929  | 9.1312211519  | 4.2227333866  |
| H33 | 6.0820199287  | 9.2883202549  | 4.6571355380  |
| C34 | 4.0815852263  | 10.0583972022 | 4.4361976172  |
| H35 | 4.2663768822  | 10.9428009417 | 5.0376664091  |
| C36 | 2.8260840330  | 9.8322568330  | 3.8739387515  |
| H37 | 2.0068327314  | 10.5275876457 | 4.0197091910  |
| C38 | 2.6298514319  | 8.6823747282  | 3.1150083489  |
| H39 | 1.6709799590  | 8.4597216987  | 2.6603678080  |
| N40 | 3.6129271168  | 7.7902203310  | 2.8983078506  |
| C41 | 5.3200701534  | 3.9561615597  | 1.1112292184  |
| O42 | 4.0053080007  | 4.1714565108  | 1.1275333909  |
| O43 | 5.8750221466  | 3.1369045004  | 0.4076668682  |
| O44 | 4.2212151706  | 6.8722728014  | -0.0968532428 |
| H45 | 4.9862453301  | 7.5037218914  | -0.0248277497 |
| H46 | 4.4946594368  | 6.1614901058  | -0.7566099940 |
| O54 | 6.3040323125  | 8.5411825561  | 0.1189612529  |
| H55 | 7.0880065499  | 8.2569082088  | -0.3723920856 |
| H56 | 6.1491775320  | 9.4529661323  | -0.1659252274 |
| O50 | 5.1329849963  | 5.0369559863  | -1.7312923925 |
| H51 | 5.3107664371  | 4.1471934517  | -1.3821046299 |
| H52 | 4.8974986024  | 4.9297515904  | -2.6615698222 |

**Figure S1c**

**E (M06/LACV3P\*\*++ 2f(Ru)) = -1576.45417544406**

**ZPE (kcal mol<sup>-1</sup>) = 253.363**

**G<sub>solv</sub> = -0.0964913**

**DH<sub>298</sub> (kcal mol<sup>-1</sup>) = 20.335**

**DS<sub>298</sub> (cal K<sup>-1</sup> mol<sup>-1</sup>) = 202.234**

Cartesian coordinates

| atom | x | y | z |
|------|---|---|---|
|------|---|---|---|

|     |                |                |                |
|-----|----------------|----------------|----------------|
| Ru1 | 3. 1242869367  | 6. 0779903354  | 1. 6666441832  |
| N2  | 2. 3670137598  | 4. 9967068853  | 3. 4835532560  |
| C3  | 3. 1228630502  | 4. 4097933051  | 4. 4234577472  |
| H4  | 4. 1969956578  | 4. 4918871638  | 4. 2933357634  |
| C5  | 2. 5813466182  | 3. 7263722743  | 5. 5061447069  |
| H6  | 3. 2330087515  | 3. 2650976827  | 6. 2398284568  |
| C7  | 1. 1935282797  | 3. 6521989849  | 5. 6122279173  |
| H8  | 0. 7281944892  | 3. 1285057581  | 6. 4413060475  |
| C9  | 0. 4055484422  | 4. 2577630078  | 4. 6387341870  |
| H10 | -0. 6734912534 | 4. 2057596621  | 4. 7123810136  |
| C11 | 1. 0162264924  | 4. 9275298670  | 3. 5725794554  |
| C12 | 0. 2550219557  | 5. 5913049684  | 2. 4881919624  |
| C13 | -1. 1401775863 | 5. 5607689061  | 2. 3996881804  |
| H14 | -1. 7281696964 | 5. 0383346220  | 3. 1437446632  |
| C15 | -1. 7747221697 | 6. 1959342538  | 1. 3356350331  |
| H16 | -2. 8568261523 | 6. 1722035122  | 1. 2548364476  |
| C17 | -1. 0031934581 | 6. 8495754180  | 0. 3766096493  |
| H18 | -1. 4562302129 | 7. 3476409302  | -0. 4733508322 |
| C19 | 0. 3805105752  | 6. 8476297829  | 0. 5165389556  |
| H20 | 1. 0412310881  | 7. 3215274627  | -0. 2020575343 |
| N21 | 0. 9917534066  | 6. 2398446140  | 1. 5495765323  |
| N22 | 5. 0768156785  | 5. 6673276389  | 1. 8964064406  |
| C23 | 5. 5154636421  | 4. 5480182571  | 1. 3108257893  |
| C24 | 6. 8674374548  | 4. 2129301476  | 1. 3873198546  |
| H25 | 7. 2292279152  | 3. 3241490405  | 0. 8841294286  |
| C26 | 7. 7218342626  | 5. 0887025303  | 2. 0545694827  |
| H27 | 8. 7820234346  | 4. 8645087518  | 2. 1165560063  |
| C28 | 7. 2346708004  | 6. 2645747337  | 2. 6394333245  |
| H29 | 7. 9104563719  | 6. 9412846005  | 3. 1492159583  |
| C30 | 5. 8729155577  | 6. 5450412672  | 2. 5419884811  |
| C31 | 5. 1513720014  | 7. 7198541428  | 3. 0828926521  |
| C32 | 5. 7809877796  | 8. 7599746238  | 3. 7680464282  |
| H33 | 6. 8526197435  | 8. 7366224716  | 3. 9267426971  |
| C34 | 5. 0237945981  | 9. 8328660669  | 4. 2334542234  |
| H35 | 5. 5046004983  | 10. 6502964891 | 4. 7613357726  |
| C36 | 3. 6487721602  | 9. 8452113731  | 4. 0083119268  |
| H37 | 3. 0253417963  | 10. 6644142361 | 4. 3488715682  |
| C38 | 3. 0772520599  | 8. 7777652523  | 3. 3217629663  |
| H39 | 2. 0140615623  | 8. 7413986209  | 3. 1109182785  |
| N40 | 3. 7997801433  | 7. 7423059423  | 2. 8730374411  |
| C41 | 4. 4241945349  | 3. 7217746260  | 0. 6423758487  |
| O42 | 3. 2070995754  | 4. 2240040116  | 0. 7212064086  |
| O43 | 4. 6814521683  | 2. 6448842830  | 0. 1211004278  |
| O44 | 3. 3199461233  | 7. 0492651650  | 0. 1914252700  |

|     |               |               |                |
|-----|---------------|---------------|----------------|
| O45 | 5. 5705747565 | 5. 3747452919 | -1. 2961042273 |
| H46 | 6. 1129943362 | 4. 6307532184 | -1. 6141982104 |
| H47 | 4. 7116647400 | 5. 2861590518 | -1. 7524393280 |
| O49 | 2. 9141535063 | 4. 6730315541 | -2. 0991201707 |
| H50 | 2. 7880769073 | 4. 4107967111 | -1. 1705483320 |
| H51 | 2. 9325060656 | 3. 8386483946 | -2. 5850204841 |
| O51 | 6. 9540537628 | 2. 8719403956 | -1. 4679991827 |
| H52 | 6. 1616673092 | 2. 5109240199 | -1. 0296253665 |
| H53 | 7. 1455259868 | 2. 2874883273 | -2. 2112435746 |

**Figure S1d**

**E (M06/LACV3P\*\*++ 2f(Ru)) = -1576.102741342**

**ZPE (kcal mol<sup>-1</sup>) = 253.165**

**G<sub>solv</sub> = -0.2274867**

**DH<sub>298</sub> (kcal mol<sup>-1</sup>) = 20.577**

**DS<sub>298</sub> (cal K<sup>-1</sup> mol<sup>-1</sup>) = 203.764**

Cartesian coordinates

| atom | x              | y             | z              |
|------|----------------|---------------|----------------|
| Ru1  | 3. 2003651395  | 6. 0607005873 | 1. 6121414792  |
| N2   | 2. 3950378053  | 5. 1884780592 | 3. 4782983160  |
| C3   | 3. 1437145287  | 4. 7513727656 | 4. 5058688747  |
| H4   | 4. 2152226100  | 4. 8904660562 | 4. 4200279270  |
| C5   | 2. 5877810533  | 4. 1414633228 | 5. 6227083918  |
| H6   | 3. 2282135193  | 3. 7959660382 | 6. 4266479358  |
| C7   | 1. 2026373524  | 3. 9843112736 | 5. 6723672111  |
| H8   | 0. 7299746726  | 3. 5111635861 | 6. 5273130773  |
| C9   | 0. 4277719690  | 4. 4412276916 | 4. 6103304083  |
| H10  | -0. 6484828640 | 4. 3261835422 | 4. 6411907995  |
| C11  | 1. 0459741909  | 5. 0443399952 | 3. 5104435933  |
| C12  | 0. 3102880757  | 5. 5565824034 | 2. 3362078896  |
| C13  | -1. 0738506640 | 5. 4563279522 | 2. 1851138778  |
| H14  | -1. 6787352361 | 4. 9828564400 | 2. 9484135207  |
| C15  | -1. 6785234694 | 5. 9624294475 | 1. 0360542398  |
| H16  | -2. 7538862247 | 5. 8868686050 | 0. 9098253396  |
| C17  | -0. 8866822148 | 6. 5564398746 | 0. 0559474594  |
| H18  | -1. 3173361145 | 6. 9584794288 | -0. 8543056436 |
| C19  | 0. 4883668321  | 6. 6268062584 | 0. 2558846853  |
| H20  | 1. 1556532264  | 7. 0602412861 | -0. 4791078349 |
| N21  | 1. 0644406259  | 6. 1487529831 | 1. 3734629727  |
| N22  | 5. 1442054287  | 5. 6184282129 | 1. 9386907068  |
| C23  | 5. 5710576517  | 4. 4899649318 | 1. 3636785106  |
| C24  | 6. 9226894688  | 4. 1645493103 | 1. 3888440860  |
| H25  | 7. 2706745112  | 3. 2708568731 | 0. 8846940880  |
| C26  | 7. 7899384763  | 5. 0577483189 | 2. 0254674349  |
| H27  | 8. 8535364722  | 4. 8428855204 | 2. 0564459141  |

|     |               |                |                |
|-----|---------------|----------------|----------------|
| C28 | 7. 3113919283 | 6. 2285586574  | 2. 6296240430  |
| H29 | 7. 9967772037 | 6. 9075621862  | 3. 1233659567  |
| C30 | 5. 9443909510 | 6. 5025088144  | 2. 5717457320  |
| C31 | 5. 2119582501 | 7. 6486252974  | 3. 1459022197  |
| C32 | 5. 8086671951 | 8. 6764650274  | 3. 8737073399  |
| H33 | 6. 8805785234 | 8. 6794446566  | 4. 0344659604  |
| C34 | 5. 0145017529 | 9. 7021516133  | 4. 3882335780  |
| H35 | 5. 4690994929 | 10. 5114971858 | 4. 9507279621  |
| C36 | 3. 6378620935 | 9. 6772227981  | 4. 1715778881  |
| H37 | 2. 9894307307 | 10. 4589784891 | 4. 5514882101  |
| C38 | 3. 0941126730 | 8. 6262572420  | 3. 4376125324  |
| H39 | 2. 0321500796 | 8. 5676340103  | 3. 2270290010  |
| N40 | 3. 8582632606 | 7. 6425263351  | 2. 9420942718  |
| C41 | 4. 4481997415 | 3. 6741572082  | 0. 7662117016  |
| O42 | 3. 2120818384 | 4. 2147943993  | 0. 9960753324  |
| O43 | 4. 5769967757 | 2. 5970486981  | 0. 2441593616  |
| O44 | 3. 3346798277 | 7. 2104139368  | 0. 3471969575  |
| O45 | 5. 0595599112 | 5. 2794333031  | -1. 1363446223 |
| H46 | 5. 6723224769 | 4. 6216651380  | -1. 5214042146 |
| H47 | 4. 2095653174 | 5. 1832485578  | -1. 6073840983 |
| O49 | 2. 3921052590 | 4. 8250201638  | -1. 9443648145 |
| H50 | 2. 2739710335 | 3. 9067902890  | -1. 6644458727 |
| H51 | 2. 1539468323 | 4. 8359701552  | -2. 8818418194 |
| O51 | 6. 7550180960 | 3. 1032562667  | -1. 6053335173 |
| H52 | 6. 1770681903 | 2. 3464266506  | -1. 4354026449 |
| H53 | 7. 2950175685 | 2. 8642847547  | -2. 3702419041 |

**Figure S1e**

**E (M06/LACV3P\*\*++ 2f(Ru)) = -1576.06966899183**

**ZPE (kcal mol<sup>-1</sup>) = 252.82**

**G<sub>solv</sub> = -0.2266143**

**DH<sub>298</sub> (kcal mol<sup>-1</sup>) = 19.535**

**DS<sub>298</sub> (cal K<sup>-1</sup> mol<sup>-1</sup>) = 197.886**

Cartesian coordinates

| atom | x             | y             | z             |
|------|---------------|---------------|---------------|
| Ru1  | 3. 5702042631 | 6. 1845748575 | 1. 6660970984 |
| N2   | 2. 5739322566 | 5. 0349647838 | 3. 2267565071 |
| C3   | 3. 1443961181 | 4. 5801219225 | 4. 3573386770 |
| H4   | 4. 1684121378 | 4. 8842991565 | 4. 5389717762 |
| C5   | 2. 4746129428 | 3. 7551265901 | 5. 2515285644 |
| H6   | 2. 9750989095 | 3. 4092672843 | 6. 1491945599 |
| C7   | 1. 1624424816 | 3. 3847039952 | 4. 9584175020 |
| H8   | 0. 6083695886 | 2. 7354919546 | 5. 6289424170 |
| C9   | 0. 5664839649 | 3. 8573385675 | 3. 7922002430 |



|     |               |               |               |
|-----|---------------|---------------|---------------|
| H10 | -0.4516815628 | 3.5747044297  | 3.5570687613  |
| C11 | 1.2907717904  | 4.6897047758  | 2.9330313538  |
| C12 | 0.7318142383  | 5.2540654444  | 1.6853004427  |
| C13 | -0.5772667811 | 5.0268511124  | 1.2555836070  |
| H14 | -1.2436151648 | 4.3960260568  | 1.8302976084  |
| C15 | -1.0296177756 | 5.6172180681  | 0.0777847274  |
| H16 | -2.0448789750 | 5.4422928097  | -0.2633486153 |
| C17 | -0.1640334775 | 6.4314257512  | -0.6486076996 |
| H18 | -0.4760795979 | 6.9132726800  | -1.5683912504 |
| C19 | 1.1314610627  | 6.6199536349  | -0.1790552226 |
| H20 | 1.8481113455  | 7.2320639314  | -0.7129036736 |
| N21 | 1.5675174797  | 6.0437367755  | 0.9573997729  |
| N22 | 5.4049872724  | 6.0397076999  | 2.4955736630  |
| C23 | 6.1608409348  | 5.0217469890  | 2.0629656039  |
| C24 | 7.4582745168  | 4.8693436542  | 2.5392643473  |
| H25 | 8.0693295696  | 4.0474158789  | 2.1826922749  |
| C26 | 7.9215044021  | 5.8058112744  | 3.4719891869  |
| H27 | 8.9286293200  | 5.7196450996  | 3.8680836209  |
| C28 | 7.1049076451  | 6.8572266958  | 3.9040917612  |
| H29 | 7.4810933751  | 7.5735062895  | 4.6255317515  |
| C30 | 5.8085309311  | 6.9654412529  | 3.3882138824  |
| C31 | 4.7776266904  | 7.9843917821  | 3.7062195315  |
| C32 | 4.9771887949  | 9.0233993827  | 4.6135752688  |
| H33 | 5.9268815904  | 9.1272921055  | 5.1259441006  |
| C34 | 3.9468954974  | 9.9324066079  | 4.8574997527  |
| H35 | 4.0941391178  | 10.7459172354 | 5.5607080982  |
| C36 | 2.7345614377  | 9.7829337362  | 4.1888033241  |
| H37 | 1.9108427990  | 10.4697904466 | 4.3488914967  |
| C38 | 2.5909053753  | 8.7256878213  | 3.2923640518  |
| H39 | 1.6704580423  | 8.5702951426  | 2.7406231247  |
| N40 | 3.5782675311  | 7.8502988874  | 3.0564800903  |
| C41 | 5.4760117293  | 4.1333291156  | 1.0373514465  |
| 042 | 4.1882424687  | 4.4327120803  | 0.8084252126  |
| 043 | 6.0688345832  | 3.2426016061  | 0.4747416826  |
| 044 | 4.1997670510  | 7.3555220973  | 0.4368687587  |
| 045 | 4.0353664636  | 7.0613571596  | -1.3230418353 |
| H46 | 3.9913560320  | 6.0418370052  | -1.5102512744 |
| 047 | 3.6725509690  | 4.6027721342  | -1.8128740692 |
| H48 | 4.0679059583  | 4.1116419508  | -2.5451116161 |
| H49 | 3.8371293132  | 4.1030236281  | -0.9889914982 |
| H50 | 4.9453189712  | 7.4296029064  | -1.5769785246 |
| 054 | 6.3834674465  | 8.0049797052  | -1.9239220703 |
| H55 | 6.8623745500  | 7.6709309397  | -2.6950989646 |
| H56 | 6.4447096211  | 8.9689147955  | -1.9760297214 |

**Figure S1f****E (M06/LACV3P\*\*++ 2f(Ru)) = -1499.34855671183****ZPE (kcal mol<sup>-1</sup>) = 230.426****G<sub>solv</sub> = -0.0928285****DH<sub>298</sub> (kcal mol<sup>-1</sup>) = 18.231****DS<sub>298</sub> (cal K<sup>-1</sup> mol<sup>-1</sup>) = 189.768**

Cartesian coordinates

| atom | x             | y             | z             |
|------|---------------|---------------|---------------|
| Ru1  | 3.5672650734  | 6.2708299432  | 1.7355880684  |
| N2   | 2.5486899503  | 4.9511652985  | 3.0855261458  |
| C3   | 3.1081196035  | 4.3566293067  | 4.1532451395  |
| H4   | 4.1250695893  | 4.6512831498  | 4.3852196190  |
| C5   | 2.4402228317  | 3.4091456330  | 4.9184215371  |
| H6   | 2.9354348219  | 2.9520105523  | 5.7678145448  |
| C7   | 1.1378692220  | 3.0636939314  | 4.5598567107  |
| H8   | 0.5852343179  | 2.3224752537  | 5.1280889082  |
| C9   | 0.5525002034  | 3.6793416796  | 3.4588094968  |
| H10  | -0.4563515449 | 3.4164948495  | 3.1670367828  |
| C11  | 1.2789400755  | 4.6261891151  | 2.7282601192  |
| C12  | 0.7417427473  | 5.3327522169  | 1.5473274677  |
| C13  | -0.5573135164 | 5.1438871595  | 1.0663756934  |
| H14  | -1.2289526755 | 4.4481030375  | 1.5532493471  |
| C15  | -0.9853301459 | 5.8557049026  | -0.0498976192 |
| H16  | -1.9903460912 | 5.7160443956  | -0.4346724591 |
| C17  | -0.1020847822 | 6.7407571846  | -0.6640779753 |
| H18  | -0.3902238980 | 7.3106372777  | -1.5404729347 |
| C19  | 1.1794590867  | 6.8843368589  | -0.1426959019 |
| H20  | 1.9210279280  | 7.5269039940  | -0.6014904907 |
| N21  | 1.5938691080  | 6.2021952196  | 0.9403672793  |
| N22  | 5.4038783441  | 6.1027372947  | 2.5238878020  |
| C23  | 6.1599074915  | 5.1196502411  | 2.0171043105  |
| C24  | 7.4710365249  | 4.9611299312  | 2.4560591134  |
| H25  | 8.0716167373  | 4.1612602020  | 2.0378182303  |
| C26  | 7.9559083157  | 5.8505779127  | 3.4210903864  |
| H27  | 8.9741846923  | 5.7532059248  | 3.7846687807  |
| C28  | 7.1439003852  | 6.8729504520  | 3.9233771730  |
| H29  | 7.5309136981  | 7.5616958178  | 4.6655847697  |
| C30  | 5.8346169211  | 6.9885866719  | 3.4434080976  |
| C31  | 4.8074952936  | 7.9868929785  | 3.8190142907  |
| C32  | 5.0206020758  | 8.9916934914  | 4.7640965540  |
| H33  | 5.9798135633  | 9.0727670647  | 5.2626336284  |
| C34  | 3.9975042787  | 9.8887072623  | 5.0591467956  |
| H35  | 4.1547063977  | 10.6749062257 | 5.7905644825  |

|     |               |                |                |
|-----|---------------|----------------|----------------|
| C36 | 2. 7753825647 | 9. 7619936249  | 4. 4013209485  |
| H37 | 1. 9533752035 | 10. 4411396423 | 4. 5985510306  |
| C38 | 2. 6210839472 | 8. 7396559962  | 3. 4697494206  |
| H39 | 1. 6925418368 | 8. 6026582714  | 2. 9264652155  |
| N40 | 3. 6015150369 | 7. 8699859187  | 3. 1794084185  |
| C41 | 5. 4551785765 | 4. 2496664680  | 0. 9687953330  |
| O42 | 4. 2089642398 | 4. 5851302226  | 0. 7185027479  |
| O43 | 6. 0716048378 | 3. 3277043333  | 0. 4649828354  |
| O44 | 4. 3739628613 | 7. 5194694309  | 0. 4879977746  |
| O45 | 4. 0379875160 | 7. 3137564222  | -0. 8648344844 |
| H50 | 4. 6993826960 | 7. 9035113485  | -1. 3175132979 |
| O54 | 5. 9326929616 | 8. 7419149352  | -2. 1133468830 |
| H55 | 5. 7058873215 | 9. 3771451663  | -2. 8045687753 |
| H56 | 6. 5807962414 | 8. 1459700282  | -2. 5114831260 |

**Figure S1g**

**E (M06/LACV3P\*\*++ 2f(Ru)) = -1422.2818695684**

**ZPE (kcal mol<sup>-1</sup>) = 208.352**

**G<sub>solv</sub> = -0.0895274**

**DH<sub>298</sub> (kcal mol<sup>-1</sup>)= 15.438**

**DS<sub>298</sub> (cal K<sup>-1</sup> mol<sup>-1</sup>)= 162.82**

Cartesian coordinates

| atom | x              | y             | z              |
|------|----------------|---------------|----------------|
| Ru1  | 3. 6316785315  | 5. 9908996473 | 1. 7051438858  |
| N2   | 2. 3471871905  | 5. 2503671656 | 3. 2023588022  |
| C3   | 2. 7415004937  | 4. 8491839449 | 4. 4233532130  |
| H4   | 3. 7884958592  | 4. 9964556650 | 4. 6600520888  |
| C5   | 1. 8657922286  | 4. 2713094201 | 5. 3317734303  |
| H6   | 2. 2240857012  | 3. 9604833187 | 6. 3066665332  |
| C7   | 0. 5340243551  | 4. 0984844332 | 4. 9533079812  |
| H8   | -0. 1794032619 | 3. 6458750317 | 5. 6345106288  |
| C9   | 0. 1266887426  | 4. 5094170862 | 3. 6888769022  |
| H10  | -0. 9035306073 | 4. 3781842436 | 3. 3817995654  |
| C11  | 1. 0528163404  | 5. 0865197490 | 2. 8146636504  |
| C12  | 0. 7230086920  | 5. 5538188758 | 1. 4537757224  |
| C13  | -0. 5374137931 | 5. 4425450668 | 0. 8639241437  |
| H14  | -1. 3613596047 | 4. 9866855161 | 1. 3994262480  |
| C15  | -0. 7234122814 | 5. 9137153091 | -0. 4340903166 |
| H16  | -1. 6954622046 | 5. 8280039673 | -0. 9087693056 |
| C17  | 0. 3505711711  | 6. 4852614995 | -1. 1136641786 |
| H18  | 0. 2449770978  | 6. 8559961869 | -2. 1270444460 |
| C19  | 1. 5845998104  | 6. 5684104984 | -0. 4750961870 |
| H20  | 2. 4665286665  | 6. 9892314368 | -0. 9426065993 |
| N21  | 1. 7549653976  | 6. 1183419261 | 0. 7775624670  |

|     |               |                |                |
|-----|---------------|----------------|----------------|
| N22 | 5. 4209668053 | 5. 6407735515  | 2. 5435075354  |
| C23 | 5. 9655755299 | 4. 4523604870  | 2. 2572027844  |
| C24 | 7. 2538679628 | 4. 1581687218  | 2. 6943545067  |
| H25 | 7. 6827931119 | 3. 1904206049  | 2. 4600319553  |
| C26 | 7. 9370179116 | 5. 1325228509  | 3. 4288069997  |
| H27 | 8. 9454780406 | 4. 9384696222  | 3. 7802662924  |
| C28 | 7. 3287413134 | 6. 3548454659  | 3. 7343712339  |
| H29 | 7. 8583508224 | 7. 0956408573  | 4. 3221008445  |
| C30 | 6. 0320120649 | 6. 5940804953  | 3. 2704106336  |
| C31 | 5. 1705769449 | 7. 7716190071  | 3. 5141342661  |
| C32 | 5. 5588767354 | 8. 8838469435  | 4. 2610915158  |
| H33 | 6. 5567279289 | 8. 9327473220  | 4. 6817449039  |
| C34 | 4. 6589510782 | 9. 9290210076  | 4. 4572560588  |
| H35 | 4. 9538731387 | 10. 8007022035 | 5. 0327193474  |
| C36 | 3. 3819883868 | 9. 8424582445  | 3. 9056806036  |
| H37 | 2. 6544120076 | 10. 6363091492 | 4. 0323221704  |
| C38 | 3. 0495050770 | 8. 7095163571  | 3. 1691663943  |
| H39 | 2. 0766293438 | 8. 5970147170  | 2. 7041949222  |
| N40 | 3. 9132047306 | 7. 7014147006  | 2. 9814823511  |
| C41 | 5. 0303357565 | 3. 4963465000  | 1. 5229302879  |
| O42 | 3. 8183998250 | 3. 9836902848  | 1. 2909794139  |
| O43 | 5. 3974942319 | 2. 3710594221  | 1. 2551908338  |
| O44 | 4. 2761729137 | 7. 4068567313  | 0. 4048280095  |
| O45 | 4. 5886258842 | 6. 1636891193  | -0. 0740304483 |

### Figure S1h

**E (M06/LACV3P\*\*++ 2f(Ru)) = -1421.92082276717**

**ZPE (kcal mol<sup>-1</sup>) = 208.51**

**G<sub>solv</sub> = -0.2328763**

**DH<sub>298</sub> (kcal mol<sup>-1</sup>)= 15.565**

**DS<sub>298</sub> (cal K<sup>-1</sup> mol<sup>-1</sup>)= 164.577**

Cartesian coordinates

| atom | x              | y             | z             |
|------|----------------|---------------|---------------|
| Ru1  | 3. 6360452233  | 5. 9955602861 | 1. 6808219320 |
| N2   | 2. 3862255274  | 5. 3092241853 | 3. 1680486104 |
| C3   | 2. 8091307625  | 4. 9455755007 | 4. 3959193606 |
| H4   | 3. 8538577548  | 5. 1156180933 | 4. 6203499476 |
| C5   | 1. 9532307436  | 4. 3744440520 | 5. 3248971731 |
| H6   | 2. 3300003079  | 4. 0927946399 | 6. 3018653145 |
| C7   | 0. 6192378198  | 4. 1683023891 | 4. 9679497491 |
| H8   | -0. 0765741724 | 3. 7172670914 | 5. 6682861712 |
| C9   | 0. 1875890711  | 4. 5449363214 | 3. 7001940137 |
| H10  | -0. 8447956605 | 4. 3892073034 | 3. 4128797878 |
| C11  | 1. 0876347511  | 5. 1167581617 | 2. 7969364882 |

|     |               |               |               |
|-----|---------------|---------------|---------------|
| C12 | 0.7307547875  | 5.5467040445  | 1.4352245021  |
| C13 | -0.5412958491 | 5.4043773663  | 0.8788668103  |
| H14 | -1.3443259062 | 4.9487895261  | 1.4450550946  |
| C15 | -0.7724564823 | 5.8435778415  | -0.4231072787 |
| H16 | -1.7556337126 | 5.7329936400  | -0.8688707003 |
| C17 | 0.2737460980  | 6.4185533485  | -1.1419725253 |
| H18 | 0.1383077817  | 6.7706448916  | -2.1585056789 |
| C19 | 1.5207402456  | 6.5315452576  | -0.5362225351 |
| H20 | 2.3598779509  | 6.9622205342  | -1.0680496584 |
| N21 | 1.7434747442  | 6.1106616445  | 0.7216549580  |
| N22 | 5.4270132163  | 5.6204473681  | 2.5564414560  |
| C23 | 5.9543556023  | 4.4189998623  | 2.2888401046  |
| C24 | 7.2262239318  | 4.0970886782  | 2.7506132626  |
| H25 | 7.6483843867  | 3.1225842749  | 2.5284279162  |
| C26 | 7.9087099940  | 5.0601732376  | 3.5041901416  |
| H27 | 8.9055706507  | 4.8465150012  | 3.8769233292  |
| C28 | 7.3119613165  | 6.2898691445  | 3.8064406008  |
| H29 | 7.8378105644  | 7.0140035553  | 4.4183693720  |
| C30 | 6.0302256828  | 6.5561453978  | 3.3140620451  |
| C31 | 5.1687285389  | 7.7315151000  | 3.5587310838  |
| C32 | 5.5355199670  | 8.8332515446  | 4.3283604698  |
| H33 | 6.5262683438  | 8.8848785875  | 4.7657117014  |
| C34 | 4.6206036663  | 9.8669995238  | 4.5315358889  |
| H35 | 4.8994264484  | 10.7303470663 | 5.1274689516  |
| C36 | 3.3496604212  | 9.7779053083  | 3.9650473055  |
| H37 | 2.6120511563  | 10.5611461376 | 4.1011332479  |
| C38 | 3.0326216623  | 8.6577149356  | 3.2021045367  |
| H39 | 2.0627233836  | 8.5452294466  | 2.7308309161  |
| N40 | 3.9164216329  | 7.6653525794  | 3.0020827234  |
| C41 | 5.0101660362  | 3.5043768944  | 1.5344337254  |
| O42 | 3.7836560485  | 4.0503510489  | 1.3217629116  |
| O43 | 5.3013692676  | 2.3884511898  | 1.1994162174  |
| O44 | 4.3266875146  | 7.4514396893  | 0.3587653521  |
| O45 | 4.6704100439  | 6.3460768266  | -0.1746424818 |

**Figure S1j**

**E (M06/LACV3P\*\*++ 2f(Ru)) = -1422.27459235295**

**ZPE (kcal mol<sup>-1</sup>) = 207.402**

**G<sub>solv</sub> = -0.0858208**

**DH<sub>298</sub> (kcal mol<sup>-1</sup>) = 16.026**

**DS<sub>298</sub> (cal K<sup>-1</sup> mol<sup>-1</sup>) = 170.824**

Cartesian coordinates

| atom | x            | y            | z            |
|------|--------------|--------------|--------------|
| Ru1  | 3.6319747418 | 5.9126841449 | 1.6836972087 |

|     |                |                |                |
|-----|----------------|----------------|----------------|
| N2  | 2. 3773462961  | 5. 1242105045  | 3. 1491409517  |
| C3  | 2. 7980021448  | 4. 6475924944  | 4. 3346170453  |
| H4  | 3. 8603354078  | 4. 7239589919  | 4. 5307710613  |
| C5  | 1. 9312725334  | 4. 0773474607  | 5. 2572815912  |
| H6  | 2. 3166954282  | 3. 7011056554  | 6. 1982893053  |
| C7  | 0. 5764945956  | 3. 9963524396  | 4. 9379195152  |
| H8  | -0. 1308736509 | 3. 5541671628  | 5. 6318972744  |
| C9  | 0. 1400305134  | 4. 4867893407  | 3. 7121470122  |
| H10 | -0. 9087905917 | 4. 4273826030  | 3. 4492595163  |
| C11 | 1. 0588709234  | 5. 0483091707  | 2. 8203796015  |
| C12 | 0. 6952633278  | 5. 5859617579  | 1. 4954280114  |
| C13 | -0. 6045264795 | 5. 5735147659  | 0. 9822225893  |
| H14 | -1. 4193831892 | 5. 1515894991  | 1. 5575537850  |
| C15 | -0. 8470713691 | 6. 0987324337  | -0. 2830045910 |
| H16 | -1. 8510843505 | 6. 0902903421  | -0. 6944730421 |
| C17 | 0. 2183577314  | 6. 6243881680  | -1. 0118462544 |
| H18 | 0. 0774837113  | 7. 0354673346  | -2. 0052107257 |
| C19 | 1. 4893295082  | 6. 6072293386  | -0. 4485131294 |
| H20 | 2. 3521933215  | 6. 9815051753  | -0. 9848715962 |
| N21 | 1. 7261118327  | 6. 1069958038  | 0. 7774034521  |
| N22 | 5. 4021228096  | 5. 5985622404  | 2. 5807127871  |
| C23 | 5. 9829201262  | 4. 4142534769  | 2. 3454921465  |
| C24 | 7. 2440461948  | 4. 1416127241  | 2. 8683366395  |
| H25 | 7. 6989321539  | 3. 1781819084  | 2. 6673653586  |
| C26 | 7. 8675202913  | 5. 1322296710  | 3. 6325753576  |
| H27 | 8. 8519451482  | 4. 9540719128  | 4. 0537555601  |
| C28 | 7. 2345416406  | 6. 3586062736  | 3. 8635350984  |
| H29 | 7. 7253665124  | 7. 1203088523  | 4. 4585417941  |
| C30 | 5. 9689383403  | 6. 5797605669  | 3. 3126800961  |
| C31 | 5. 1208869291  | 7. 7894365453  | 3. 4358964798  |
| C32 | 5. 4950540432  | 8. 9227423094  | 4. 1593051919  |
| H33 | 6. 4546284300  | 8. 9542841352  | 4. 6619280508  |
| C34 | 4. 6318680962  | 10. 0135966865 | 4. 2284335800  |
| H35 | 4. 9168019443  | 10. 8994239850 | 4. 7869749188  |
| C36 | 3. 4043018934  | 9. 9514880710  | 3. 5718339896  |
| H37 | 2. 7050153614  | 10. 7797590588 | 3. 5980444992  |
| C38 | 3. 0843569619  | 8. 7955162777  | 2. 8664829861  |
| H39 | 2. 1454010941  | 8. 6984924666  | 2. 3326137179  |
| N40 | 3. 9109158609  | 7. 7400368401  | 2. 7954538998  |
| C41 | 5. 1366844529  | 3. 4568512795  | 1. 5057549906  |
| 042 | 3. 9744435265  | 3. 9513921089  | 1. 1257388028  |
| 043 | 5. 5569183022  | 2. 3413270041  | 1. 2652451380  |
| 044 | 4. 6950200291  | 7. 0487541817  | 0. 2514858868  |
| 045 | 4. 5656368246  | 6. 2961331158  | -0. 7677360212 |

**Figure S1k****E (M06/LACV3P\*\*++ 2f(Ru)) = -1498.653248****ZPE (kcal mol<sup>-1</sup>) = 221.522****G<sub>solv</sub> = -0.0828617****DH<sub>298</sub> (kcal mol<sup>-1</sup>) = 18.521****DS<sub>298</sub> (cal K<sup>-1</sup> mol<sup>-1</sup>) = 193.868**

Cartesian coordinates

| atom | x             | y             | z             |
|------|---------------|---------------|---------------|
| Ru1  | 3.4491510801  | 5.9419494311  | 2.2473784449  |
| N2   | 1.9091788933  | 5.0912510400  | 3.8023090650  |
| C3   | 2.2143488531  | 4.5588701390  | 4.9920746922  |
| H4   | 3.2042983222  | 4.7862109577  | 5.3772833347  |
| C5   | 1.3299001808  | 3.7540819742  | 5.7038119400  |
| H6   | 1.6172241206  | 3.3427919843  | 6.6653646911  |
| C7   | 0.0827702828  | 3.4870158522  | 5.1401443553  |
| H8   | -0.6315338818 | 2.8510883817  | 5.6533559374  |
| C9   | -0.2373296767 | 4.0390898617  | 3.9035705571  |
| H10  | -1.1970033968 | 3.8237076046  | 3.4498203467  |
| C11  | 0.7001853645  | 4.8500049784  | 3.2516884342  |
| C12  | 0.4445225197  | 5.4976675232  | 1.9420930135  |
| C13  | -0.8151160949 | 5.5083002096  | 1.3331820695  |
| H14  | -1.6570287722 | 5.0219294504  | 1.8098264557  |
| C15  | -0.9899053411 | 6.1573760282  | 0.1156491245  |
| H16  | -1.9635076516 | 6.1655091465  | -0.3638682367 |
| C17  | 0.0996255295  | 6.7997011141  | -0.4702706705 |
| H18  | 0.0084534390  | 7.3232089406  | -1.4155503905 |
| C19  | 1.3265419869  | 6.7561821500  | 0.1805327344  |
| H20  | 2.2095803367  | 7.2420919195  | -0.2205504263 |
| N21  | 1.5017179155  | 6.1177718890  | 1.3546694459  |
| N22  | 5.3090293880  | 5.7069855038  | 2.9600480910  |
| C23  | 5.9133396181  | 4.5422736044  | 2.6670491219  |
| C24  | 7.2187021749  | 4.3040467559  | 3.0797688918  |
| H25  | 7.6843479735  | 3.3578338857  | 2.8280269433  |
| C26  | 7.8719392256  | 5.2994116873  | 3.8150998070  |
| H27  | 8.8916011891  | 5.1460574399  | 4.1537579857  |
| C28  | 7.2133827609  | 6.4899259558  | 4.1326473205  |
| H29  | 7.7165732134  | 7.2495978044  | 4.7197640113  |
| C30  | 5.9000164784  | 6.6791672016  | 3.6900662697  |
| C31  | 5.0136467664  | 7.8317053471  | 3.9489915071  |
| C32  | 5.3849138813  | 8.9502150343  | 4.6988737480  |
| H33  | 6.3830261684  | 9.0192556855  | 5.1155551528  |
| C34  | 4.4648255670  | 9.9730680047  | 4.9107367829  |
| H35  | 4.7439247166  | 10.8455963494 | 5.4929150216  |

|     |               |                |                |
|-----|---------------|----------------|----------------|
| C36 | 3. 1828774013 | 9. 8582685653  | 4. 3725098299  |
| H37 | 2. 4360693162 | 10. 6307939939 | 4. 5192358968  |
| C38 | 2. 8692296093 | 8. 7195163791  | 3. 6385518920  |
| H39 | 1. 8863030354 | 8. 5763689462  | 3. 2031061367  |
| N40 | 3. 7540249630 | 7. 7313226738  | 3. 4218972970  |
| C41 | 5. 0276188363 | 3. 5593394629  | 1. 9079879031  |
| O42 | 3. 7895820671 | 3. 9904766753  | 1. 7169358087  |
| O43 | 5. 4712468777 | 2. 4821763209  | 1. 5622591405  |
| O44 | 4. 3157485392 | 5. 5196903972  | -0. 7918033703 |
| O45 | 3. 9277253547 | 4. 4812079685  | -1. 2941147783 |
| O46 | 4. 2714271685 | 8. 1997017757  | 0. 2931697924  |
| H47 | 4. 4422483381 | 9. 1502104605  | 0. 2803628351  |
| H48 | 4. 8327274681 | 7. 8299119466  | -0. 4004524905 |

### Figure S11

**E (M06/LACV3P\*\*++ 2f(Ru)) = -1271.957168**

**ZPE (kcal mol<sup>-1</sup>) = 204.004**

**G<sub>solv</sub> = -0.0939118**

**DH<sub>298</sub> (kcal mol<sup>-1</sup>) = 14.082**

**DS<sub>298</sub> (cal K<sup>-1</sup> mol<sup>-1</sup>) = 154.535**

Cartesian coordinates

| atom | x              | y             | z              |
|------|----------------|---------------|----------------|
| Ru1  | 3. 5641284683  | 5. 9206402252 | 1. 7427361011  |
| N2   | 2. 3636641202  | 5. 1982038079 | 3. 1805847957  |
| C3   | 2. 8000174834  | 4. 7707598036 | 4. 3852616304  |
| H4   | 3. 8604538750  | 4. 8742001231 | 4. 5720075439  |
| C5   | 1. 9469982279  | 4. 2196534740 | 5. 3300407273  |
| H6   | 2. 3479165124  | 3. 8873182724 | 6. 2811250554  |
| C7   | 0. 5905139249  | 4. 0994235722 | 5. 0278305742  |
| H8   | -0. 1023271645 | 3. 6691087273 | 5. 7432074026  |
| C9   | 0. 1385904899  | 4. 5388820471 | 3. 7891016784  |
| H10  | -0. 9105696777 | 4. 4543276391 | 3. 5328912178  |
| C11  | 1. 0356562678  | 5. 0871886981 | 2. 8688370794  |
| C12  | 0. 6598568767  | 5. 5807928221 | 1. 5364537284  |
| C13  | -0. 6326151862 | 5. 5314384192 | 1. 0073757151  |
| H14  | -1. 4463973909 | 5. 1055371180 | 1. 5821030833  |
| C15  | -0. 8659118730 | 6. 0243829119 | -0. 2721795731 |
| H16  | -1. 8630374786 | 5. 9882421469 | -0. 6982408276 |
| C17  | 0. 2006000533  | 6. 5568013726 | -0. 9982454506 |
| H18  | 0. 0637779611  | 6. 9453899977 | -2. 0011410616 |
| C19  | 1. 4620560839  | 6. 5776100545 | -0. 4163572573 |
| H20  | 2. 3248097128  | 6. 9715066583 | -0. 9442605406 |
| N21  | 1. 6927285438  | 6. 1056889630 | 0. 8227250198  |
| N22  | 5. 3578830700  | 5. 6078698158 | 2. 5857054833  |



|     |               |                |               |
|-----|---------------|----------------|---------------|
| C23 | 5. 9553531618 | 4. 4454361792  | 2. 2789515612 |
| C24 | 7. 2129046238 | 4. 1558509468  | 2. 7980706699 |
| H25 | 7. 6811286500 | 3. 2114305349  | 2. 5442000838 |
| C26 | 7. 8212640884 | 5. 1059464723  | 3. 6250768562 |
| H27 | 8. 8015771832 | 4. 9087483565  | 4. 0474105503 |
| C28 | 7. 1844855932 | 6. 3193276811  | 3. 9076829306 |
| H29 | 7. 6719326334 | 7. 0565004718  | 4. 5356047028 |
| C30 | 5. 9204539049 | 6. 5601475825  | 3. 3607527791 |
| C31 | 5. 0734608825 | 7. 7678773744  | 3. 5062537278 |
| C32 | 5. 4284192506 | 8. 8662194206  | 4. 2901686791 |
| H33 | 6. 3638247601 | 8. 8614308863  | 4. 8375934635 |
| C34 | 4. 5773427946 | 9. 9658958930  | 4. 3681541372 |
| H35 | 4. 8460249021 | 10. 8229819363 | 4. 9770623126 |
| C36 | 3. 3811335897 | 9. 9452020307  | 3. 6534927508 |
| H37 | 2. 6887010188 | 10. 7792319238 | 3. 6844704106 |
| C38 | 3. 0788108448 | 8. 8234136266  | 2. 8878057770 |
| H39 | 2. 1598902013 | 8. 7609484111  | 2. 3152192669 |
| N40 | 3. 8914322248 | 7. 7545071015  | 2. 8061558490 |
| C41 | 5. 1521135560 | 3. 5537013088  | 1. 3225557564 |
| O42 | 4. 0242402004 | 4. 0844286471  | 0. 8951845464 |
| O43 | 5. 6065048565 | 2. 4676011360  | 1. 0137596816 |

**Figure S1n**

**E (M06/LACV3P\*\*++ 2f(Ru)) = -1421.915684**

**ZPE (kcal mol<sup>-1</sup>) = 207.642**

**G<sub>solv</sub> = -0.2313382**

**DH<sub>298</sub> (kcal mol<sup>-1</sup>) = 16.313**

**DS<sub>298</sub> (cal K<sup>-1</sup> mol<sup>-1</sup>) = 175.676**

Cartesian coordinates

| atom | x              | y             | z              |
|------|----------------|---------------|----------------|
| Ru1  | 3. 5598761171  | 5. 9363173759 | 1. 7318357869  |
| N2   | 2. 3290529907  | 5. 1978364804 | 3. 1794873779  |
| C3   | 2. 7621762933  | 4. 7612487259 | 4. 3773295823  |
| H4   | 3. 8179663428  | 4. 8772419019 | 4. 5842165580  |
| C5   | 1. 9010184526  | 4. 1828321299 | 5. 3014041844  |
| H6   | 2. 2890070452  | 3. 8424912302 | 6. 2551308887  |
| C7   | 0. 5532686917  | 4. 0476666403 | 4. 9710292523  |
| H8   | -0. 1446138281 | 3. 5951203860 | 5. 6681266028  |
| C9   | 0. 1100273289  | 4. 4981958978 | 3. 7303267958  |
| H10  | -0. 9339984166 | 4. 3988703289 | 3. 4593756417  |
| C11  | 1. 0147265244  | 5. 0725702845 | 2. 8355884147  |
| C12  | 0. 6572208493  | 5. 5794625216 | 1. 5010848156  |
| C13  | -0. 6202523069 | 5. 5174227946 | 0. 9454982645  |
| H14  | -1. 4398752638 | 5. 0691698298 | 1. 4938769505  |
| C15  | -0. 8360435141 | 6. 0280253193 | -0. 3339282785 |

|     |               |               |               |
|-----|---------------|---------------|---------------|
| H16 | -1.8249417649 | 5.9788928825  | -0.7785405861 |
| C17 | 0.2291151076  | 6.5945311819  | -1.0353052309 |
| H18 | 0.1001701268  | 6.9984336163  | -2.0332182919 |
| C19 | 1.4805671495  | 6.6256704457  | -0.4337218877 |
| H20 | 2.3415765252  | 7.0447136664  | -0.9418433664 |
| N21 | 1.6909164631  | 6.1333042617  | 0.8040709050  |
| N22 | 5.3897938252  | 5.6117247526  | 2.5939258122  |
| C23 | 5.9769769093  | 4.4390902388  | 2.3141916296  |
| C24 | 7.2567497055  | 4.1603043951  | 2.7800400304  |
| H25 | 7.7152304687  | 3.2055146066  | 2.5446175542  |
| C26 | 7.9008336612  | 5.1407463219  | 3.5428800664  |
| H27 | 8.9001461557  | 4.9593347413  | 3.9261733991  |
| C28 | 7.2684767625  | 6.3584099797  | 3.8183124837  |
| H29 | 7.7762752913  | 7.1122458798  | 4.4091825090  |
| C30 | 5.9814991359  | 6.5834296584  | 3.3194023212  |
| C31 | 5.1349601544  | 7.7845558854  | 3.4845185188  |
| C32 | 5.5105708575  | 8.9165157253  | 4.2042778928  |
| H33 | 6.4831880677  | 8.9620552643  | 4.6809733907  |
| C34 | 4.6269389785  | 9.9916193350  | 4.3071108120  |
| H35 | 4.9115136595  | 10.8787898774 | 4.8639290507  |
| C36 | 3.3785432488  | 9.9096071563  | 3.6927500284  |
| H37 | 2.6629672328  | 10.7222020892 | 3.7527545617  |
| C38 | 3.0524890963  | 8.7527483851  | 2.9908780386  |
| H39 | 2.0922278630  | 8.6414337241  | 2.4994025859  |
| N40 | 3.9074220165  | 7.7197101529  | 2.8775810741  |
| C41 | 5.1152631977  | 3.5185619717  | 1.4708954871  |
| O42 | 3.8908595777  | 4.0354889474  | 1.2398342002  |
| O43 | 5.4903057675  | 2.4451101913  | 1.0800112954  |
| O44 | 4.7933508162  | 6.7182991921  | -0.0667269913 |
| O45 | 5.2958571665  | 6.0839047196  | -0.9756399108 |

**Figure S1o**

**E (M06/LACV3P\*\*++ 2f(Ru)) = -1498.307244**

**ZPE (kcal mol<sup>-1</sup>) = 221.627**

**G<sub>solv</sub> = -0.2258081**

**DH<sub>298</sub> (kcal mol<sup>-1</sup>) = 18.579**

**DS<sub>298</sub> (cal K<sup>-1</sup> mol<sup>-1</sup>) = 194.644**

Cartesian coordinates

| atom | x            | y            | z            |
|------|--------------|--------------|--------------|
| Ru1  | 3.4194266982 | 5.8400051812 | 2.0836904175 |
| N2   | 1.9597267058 | 5.0328021640 | 3.6854398013 |
| C3   | 2.2829974130 | 4.5284611477 | 4.8849673842 |
| H4   | 3.2885080432 | 4.7308284903 | 5.2402278679 |
| C5   | 1.3856321882 | 3.7817413869 | 5.6428632731 |
| H6   | 1.6818144896 | 3.3897367604 | 6.6095358788 |

|     |               |               |               |
|-----|---------------|---------------|---------------|
| C7  | 0.1140935994  | 3.5501436304  | 5.1210321898  |
| H8  | -0.6115458045 | 2.9627091934  | 5.6745781200  |
| C9  | -0.2221590788 | 4.0777319482  | 3.8745686995  |
| H10 | -1.2068068498 | 3.8932549685  | 3.4630656472  |
| C11 | 0.7242349237  | 4.8258667313  | 3.1690715271  |
| C12 | 0.4551292201  | 5.4423041877  | 1.8453553030  |
| C13 | -0.7956339785 | 5.4153743943  | 1.2285771344  |
| H14 | -1.6319833543 | 4.9176204186  | 1.7027934089  |
| C15 | -0.9748466978 | 6.0392913131  | -0.0060365281 |
| H16 | -1.9461874671 | 6.0130927465  | -0.4899656600 |
| C17 | 0.0966044354  | 6.7041091768  | -0.6011498260 |
| H18 | -0.0091674256 | 7.2123911535  | -1.5530323430 |
| C19 | 1.3224690543  | 6.7065168089  | 0.0510437937  |
| H20 | 2.1842554742  | 7.2403863059  | -0.3397094675 |
| N21 | 1.4988699653  | 6.0788291865  | 1.2359548843  |
| N22 | 5.3081863851  | 5.5451327765  | 2.8641850831  |
| C23 | 5.8905087104  | 4.3648279518  | 2.6078238509  |
| C24 | 7.1633142124  | 4.0730295531  | 3.0806145123  |
| H25 | 7.6098473926  | 3.1091684982  | 2.8596430696  |
| C26 | 7.8192613290  | 5.0554484182  | 3.8310668046  |
| H27 | 8.8165286858  | 4.8688644523  | 4.2169454183  |
| C28 | 7.1964874311  | 6.2794185102  | 4.0883042247  |
| H29 | 7.7087757206  | 7.0363871456  | 4.6705696160  |
| C30 | 5.9112477801  | 6.5124057337  | 3.5861387799  |
| C31 | 5.0825493965  | 7.7207484245  | 3.7498389592  |
| C32 | 5.4603400723  | 8.8479067964  | 4.4751783892  |
| H33 | 6.4262313978  | 8.8854096280  | 4.9650166733  |
| C34 | 4.5820897896  | 9.9275108888  | 4.5717932136  |
| H35 | 4.8639031221  | 10.8083676046 | 5.1401490924  |
| C36 | 3.3430932928  | 9.8609177638  | 3.9353054313  |
| H37 | 2.6339480818  | 10.6796013158 | 3.9908567903  |
| C38 | 3.0192035191  | 8.7130046753  | 3.2197301149  |
| H39 | 2.0701273450  | 8.6130860289  | 2.7060127787  |
| N40 | 3.8624090612  | 7.6676116182  | 3.1323300857  |
| C41 | 5.0190812505  | 3.4438055615  | 1.7916205212  |
| 042 | 3.8419431817  | 4.0532423088  | 1.4528013837  |
| 043 | 5.3050417348  | 2.3224533026  | 1.4846634155  |
| 044 | 4.6263650197  | 6.0698878399  | -0.4809170790 |
| 045 | 5.1668601137  | 5.0661721221  | -0.9051719866 |
| 046 | 3.7951805708  | 8.7691825524  | 0.0435386053  |
| H47 | 3.4781431752  | 9.6535080826  | -0.1858765216 |
| H48 | 4.5489039150  | 8.6288244213  | -0.5451156027 |

**Figure S1p**

**E (M06/LACV3P\*\*++ 2f(Ru)) = -1271.604577**

**ZPE (kcal mol<sup>-1</sup>) = 204.395**

**G<sub>solv</sub> = -0.2566094**

**DH<sub>298</sub> (kcal mol<sup>-1</sup>)= 14.087**

**DS<sub>298</sub> (cal K<sup>-1</sup> mol<sup>-1</sup>)= 155.541**

Cartesian coordinates

| atom | x             | y             | z             |
|------|---------------|---------------|---------------|
| Ru1  | 3.5429340334  | 5.8939112611  | 1.8030222562  |
| N2   | 2.2604311055  | 5.2069691796  | 3.2026578871  |
| C3   | 2.6688322186  | 4.7779375552  | 4.4124633640  |
| H4   | 3.7238819976  | 4.8765289126  | 4.6320241686  |
| C5   | 1.7784571942  | 4.2311832155  | 5.3276013652  |
| H6   | 2.1432917857  | 3.8949468371  | 6.2918121820  |
| C7   | 0.4330728725  | 4.1215352841  | 4.9763534796  |
| H8   | -0.2854356750 | 3.6941608337  | 5.6684233607  |
| C9   | 0.0189930843  | 4.5631052498  | 3.7222120466  |
| H10  | -1.0218702774 | 4.4817962378  | 3.4322509662  |
| C11  | 0.9493814467  | 5.1045983852  | 2.8341369486  |
| C12  | 0.6399285663  | 5.5930090580  | 1.4837246449  |
| C13  | -0.6164591272 | 5.5562471609  | 0.8815243563  |
| H14  | -1.4709972470 | 5.1476294364  | 1.4077232046  |
| C15  | -0.7621778327 | 6.0406244609  | -0.4186312729 |
| H16  | -1.7335720586 | 6.0126751396  | -0.9021330894 |
| C17  | 0.3487656866  | 6.5507396806  | -1.0930140570 |
| H18  | 0.2722578375  | 6.9277811282  | -2.1067760479 |
| C19  | 1.5767055602  | 6.5595846055  | -0.4421820726 |
| H20  | 2.4750150774  | 6.9319202489  | -0.9258018204 |
| N21  | 1.7152626039  | 6.0990653877  | 0.8163825117  |
| N22  | 5.4136037456  | 5.6185801607  | 2.5762600130  |
| C23  | 6.0198857851  | 4.4655210819  | 2.2507696031  |
| C24  | 7.3367725102  | 4.2299458321  | 2.6261719529  |
| H25  | 7.8113273487  | 3.2924612988  | 2.3557114246  |
| C26  | 7.9970737578  | 5.2311267889  | 3.3476142195  |
| H27  | 9.0255294957  | 5.0825608650  | 3.6618192012  |
| C28  | 7.3465438404  | 6.4287805558  | 3.6681676574  |
| H29  | 7.8708366601  | 7.1993438827  | 4.2218078198  |
| C30  | 6.0225839210  | 6.6117529709  | 3.2598321520  |
| C31  | 5.1530451832  | 7.7889867293  | 3.4738232011  |
| C32  | 5.5353770596  | 8.9280684164  | 4.1778578745  |
| H33  | 6.5277809160  | 8.9958005188  | 4.6089666340  |
| C34  | 4.6325390593  | 9.9825193672  | 4.3243329208  |
| H35  | 4.9219708975  | 10.8749362096 | 4.8702258919  |
| C36  | 3.3595367898  | 9.8728975145  | 3.7675976529  |
| H37  | 2.6293965586  | 10.6691377392 | 3.8621042059  |
| C38  | 3.0276703469  | 8.7091469859  | 3.0800304550  |

|     |               |               |               |
|-----|---------------|---------------|---------------|
| H39 | 2. 0478801081 | 8. 5768003149 | 2. 6343725615 |
| N40 | 3. 8990006499 | 7. 6945997026 | 2. 9251961311 |
| C41 | 5. 1334631200 | 3. 5203386761 | 1. 4621038002 |
| O42 | 3. 8835435753 | 4. 0079725954 | 1. 2914081272 |
| O43 | 5. 5101670164 | 2. 4538995073 | 1. 0566529754 |

**Figure S1q**

**E (M06/LACV3P\*\*++ 2f(Ru)) = -1576.09641357245**

**ZPE (kcal mol<sup>-1</sup>) = 253.432**

**G<sub>solv</sub> = -0.2297897**

**DH<sub>298</sub> (kcal mol<sup>-1</sup>) = 19.836**

**DS<sub>298</sub> (cal K<sup>-1</sup> mol<sup>-1</sup>) = 196.632**

Cartesian coordinates

| atom | x              | y             | z              |
|------|----------------|---------------|----------------|
| Ru1  | 3. 5782105470  | 5. 8977256399 | 1. 5926420688  |
| N2   | 2. 4030957192  | 5. 3235620521 | 3. 3554154954  |
| C3   | 2. 9197319815  | 5. 1054717033 | 4. 5772368536  |
| H4   | 3. 9832835346  | 5. 2765053626 | 4. 6946176737  |
| C5   | 2. 1387700823  | 4. 6740329351 | 5. 6409786333  |
| H6   | 2. 5919384986  | 4. 5031942510 | 6. 6112240508  |
| C7   | 0. 7763154288  | 4. 4640572625 | 5. 4233895423  |
| H8   | 0. 1336355592  | 4. 1261096509 | 6. 2301669961  |
| C9   | 0. 2459834993  | 4. 6909242309 | 4. 1572469601  |
| H10  | -0. 8101772239 | 4. 5322075253 | 3. 9782576244  |
| C11  | 1. 0824838160  | 5. 1208851115 | 3. 1216144616  |
| C12  | 0. 6191275992  | 5. 3813233142 | 1. 7440620485  |
| C13  | -0. 6929178180 | 5. 1812150039 | 1. 3141021788  |
| H14  | -1. 4478947521 | 4. 8137443923 | 1. 9980088752  |
| C15  | -1. 0272389234 | 5. 4477051706 | -0. 0125170465 |
| H16  | -2. 0442853700 | 5. 2921663307 | -0. 3579721404 |
| C17  | -0. 0420601924 | 5. 9058255118 | -0. 8837205966 |
| H18  | -0. 2609579176 | 6. 1175059723 | -1. 9242963171 |
| C19  | 1. 2525087629  | 6. 0881895431 | -0. 4055282143 |
| H20  | 2. 0597172670  | 6. 4227321355 | -1. 0517978787 |
| N21  | 1. 5625171448  | 5. 8387536882 | 0. 8803686034  |
| N22  | 5. 4318178800  | 5. 6097176365 | 2. 3746494992  |
| C23  | 5. 9667527964  | 4. 4051764278 | 2. 1521794474  |
| C24  | 7. 2859788925  | 4. 1493931332 | 2. 5055325261  |
| H25  | 7. 7163535114  | 3. 1718941039 | 2. 3179394929  |
| C26  | 8. 0046683331  | 5. 1880920277 | 3. 1106897998  |
| H27  | 9. 0392726478  | 5. 0309086211 | 3. 3994588228  |
| C28  | 7. 4001238765  | 6. 4226511796 | 3. 3779944414  |
| H29  | 7. 9586830082  | 7. 2051840626 | 3. 8790321051  |
| C30  | 6. 0698893316  | 6. 6199089676 | 2. 9974533329  |
| C31  | 5. 2001056505  | 7. 7883175371 | 3. 2445308199  |

|     |               |                |                |
|-----|---------------|----------------|----------------|
| C32 | 5. 5983606619 | 8. 9483009275  | 3. 9057678339  |
| H33 | 6. 6210662963 | 9. 0558066320  | 4. 2485982163  |
| C34 | 4. 6716110670 | 9. 9686309116  | 4. 1222942388  |
| H35 | 4. 9740494833 | 10. 8780524557 | 4. 6318118427  |
| C36 | 3. 3603472232 | 9. 8088420541  | 3. 6778956979  |
| H37 | 2. 6134196122 | 10. 5812001393 | 3. 8247099221  |
| C38 | 3. 0151437139 | 8. 6321949403  | 3. 0175072825  |
| H39 | 2. 0164682449 | 8. 4650233375  | 2. 6306755787  |
| N40 | 3. 9085577074 | 7. 6545629766  | 2. 8150353233  |
| C41 | 4. 9659550948 | 3. 4289030274  | 1. 5784800620  |
| O42 | 3. 7158928722 | 3. 9218208077  | 1. 5396273655  |
| O43 | 5. 2502278733 | 2. 3015136948  | 1. 2506424208  |
| O44 | 3. 8887299190 | 7. 0614218445  | 0. 3488304567  |
| O45 | 4. 9407452506 | 4. 8034454594  | -0. 7416872626 |
| H46 | 4. 6464368486 | 3. 9265885334  | -1. 0830882093 |
| H47 | 4. 6657240179 | 5. 4491841136  | -1. 4189286190 |
| O49 | 3. 6979121308 | 6. 5197206272  | -2. 6511549353 |
| H50 | 4. 1342580255 | 7. 3565841578  | -2. 8610537991 |
| H51 | 3. 5940579037 | 6. 0731570058  | -3. 5029116846 |
| O51 | 3. 9905791677 | 2. 3179893433  | -1. 3672160352 |
| H52 | 4. 2064901352 | 1. 8666650586  | -0. 5357545009 |
| H53 | 4. 3704886662 | 1. 7653453043  | -2. 0627847896 |

**Figure S1r**

**E (M06/LACV3P\*\*++ 2f(Ru)) = -1576.10281022977**

**ZPE (kcal mol<sup>-1</sup>) = 254.164**

**G<sub>solv</sub> = -0.2282873**

**DH<sub>298</sub> (kcal mol<sup>-1</sup>) = 19.624**

**DS<sub>298</sub> (cal K<sup>-1</sup> mol<sup>-1</sup>) = 193.156**

Cartesian coordinates

| atom | x              | y             | z             |
|------|----------------|---------------|---------------|
| Ru1  | 3. 6311047570  | 5. 8221773562 | 1. 5451977002 |
| N2   | 2. 3492437146  | 5. 1387938266 | 3. 2162487695 |
| C3   | 2. 8499210477  | 4. 7362206412 | 4. 3952844930 |
| H4   | 3. 9261775848  | 4. 7817974704 | 4. 5074631136 |
| C5   | 2. 0315526632  | 4. 2693751623 | 5. 4158594235 |
| H6   | 2. 4685428987  | 3. 9536060474 | 6. 3568351068 |
| C7   | 0. 6550101838  | 4. 2067701864 | 5. 1924430531 |
| H8   | -0. 0128151463 | 3. 8390838867 | 5. 9650468852 |
| C9   | 0. 1437231917  | 4. 6154802362 | 3. 9642856826 |
| H10  | -0. 9213833629 | 4. 5654981147 | 3. 7765887246 |
| C11  | 1. 0193801650  | 5. 0840011792 | 2. 9783466920 |
| C12  | 0. 5989818367  | 5. 5496943657 | 1. 6443070090 |
| C13  | -0. 7283513667 | 5. 5818654454 | 1. 2127700235 |
| H14  | -1. 5250555171 | 5. 2392615882 | 1. 8616835045 |

|     |               |               |               |
|-----|---------------|---------------|---------------|
| C15 | -1.0232417876 | 6.0581881191  | -0.0626285266 |
| H16 | -2.0511610179 | 6.0860291176  | -0.4099693102 |
| C17 | 0.0172767484  | 6.4973709589  | -0.8784757838 |
| H18 | -0.1677175904 | 6.8799115577  | -1.8760284900 |
| C19 | 1.3214042677  | 6.4405176759  | -0.3977641596 |
| H20 | 2.1604509031  | 6.7617451122  | -1.0035993382 |
| N21 | 1.6016750483  | 5.9761300711  | 0.8337329660  |
| N22 | 5.5652641081  | 5.7056018850  | 2.2887605138  |
| C23 | 6.2209405490  | 4.5520360444  | 2.1253694247  |
| C24 | 7.5758494351  | 4.4573890530  | 2.4234295609  |
| H25 | 8.0960914947  | 3.5176505040  | 2.2733360943  |
| C26 | 8.2037954995  | 5.5933496898  | 2.9475803224  |
| H27 | 9.2603987855  | 5.5636282574  | 3.1949714960  |
| C28 | 7.4677366395  | 6.7533219767  | 3.2127520614  |
| H29 | 7.9431823072  | 7.6027036230  | 3.6899087538  |
| C30 | 6.1100469152  | 6.7855459473  | 2.8792361815  |
| C31 | 5.1175553587  | 7.8254842275  | 3.2123214029  |
| C32 | 5.4180873690  | 9.0387083057  | 3.8283569247  |
| H33 | 6.4482505903  | 9.3009180111  | 4.0415188272  |
| C34 | 4.3837512869  | 9.9118060939  | 4.1648400314  |
| H35 | 4.6061084481  | 10.8619276875 | 4.6401452668  |
| C36 | 3.0673871427  | 9.5507587645  | 3.8833391453  |
| H37 | 2.2361535984  | 10.2015052210 | 4.1311474032  |
| C38 | 2.8269554788  | 8.3306582347  | 3.2571369933  |
| H39 | 1.8236039359  | 8.0149598116  | 2.9967089171  |
| N40 | 3.8215355749  | 7.4917450658  | 2.9374466025  |
| C41 | 5.2837999729  | 3.4285659046  | 1.7551429802  |
| O42 | 4.0152758780  | 3.7661806603  | 1.9213148468  |
| O43 | 5.6669635177  | 2.3234775368  | 1.4185199418  |
| O44 | 4.0512605697  | 7.1240334027  | 0.4492358915  |
| O45 | 3.9842108917  | 4.7211907315  | -0.3086989236 |
| H46 | 3.7204679924  | 3.7518657735  | -0.4298816340 |
| H47 | 3.9441005550  | 5.2349015991  | -1.1553291790 |
| O49 | 3.8196998075  | 6.1970311993  | -2.5528435185 |
| H50 | 4.5360869578  | 6.8392569865  | -2.6522964045 |
| H51 | 3.7527994434  | 5.7478562927  | -3.4073706508 |
| O51 | 3.7072429797  | 2.1843968667  | -0.6692309615 |
| H52 | 4.3508156287  | 1.8322764859  | -0.0262949132 |
| H53 | 2.9218710472  | 1.6277662901  | -0.5971474939 |

**Figure S1s**

**E (M06/LACV3P\*\*++ 2f(Ru)) = -1576.07675468096**

**ZPE (kcal mol<sup>-1</sup>) = 252.021**

**G<sub>solv</sub> = -0.2274033**

**DH<sub>298</sub> (kcal mol<sup>-1</sup>) = 18.932**

**DS<sub>298</sub> (cal K<sup>-1</sup> mol<sup>-1</sup>)= 187.966**

Cartesian coordinates

| atom | x                | y                | z                |
|------|------------------|------------------|------------------|
| O42  | 0.000000000000   | 0.000000000000   | 0.000000000000   |
| H52  | 0.000000000000   | 0.000000000000   | 1.2192836561000  |
| Ru1  | 2.2225475762649  | 0.000000000000   | -0.7179272024747 |
| N2   | 1.5086992065542  | -2.0543975751595 | -0.6146302129536 |
| C3   | 0.4768521507195  | -2.4919783852345 | -1.3587705319242 |
| H4   | -0.0010177694142 | -1.7640858724367 | -2.0007854408137 |
| C5   | 0.0381747020334  | -3.8072874062495 | -1.2928551820512 |
| H6   | -0.7980190292918 | -4.1270466747573 | -1.9048312298328 |
| C7   | 0.6867023355328  | -4.6874416601932 | -0.4243792902453 |
| H8   | 0.3656498100998  | -5.7213077943352 | -0.3448083734910 |
| C9   | 1.7511206939161  | -4.2262296021278 | 0.3439617952684  |
| H10  | 2.2610359353959  | -4.8961380887162 | 1.0253359279744  |
| C11  | 2.1535827999575  | -2.8918136934298 | 0.2316516198024  |
| C12  | 3.2682083614342  | -2.2895613303870 | 0.9804116743176  |
| C13  | 4.0626988300573  | -2.9835809860827 | 1.8943086415255  |
| H14  | 3.8750671407462  | -4.0291467219981 | 2.1052614996774  |
| C15  | 5.1045271614554  | -2.3154966972609 | 2.5350045880452  |
| H16  | 5.7330258633335  | -2.8405943081362 | 3.2471765615753  |
| C17  | 5.3259116072838  | -0.9706139850293 | 2.2464951718751  |
| H18  | 6.1277686848536  | -0.4149306171851 | 2.7201404489128  |
| C19  | 4.4989305107006  | -0.3277572445275 | 1.3294353483262  |
| H20  | 4.6337595922074  | 0.7202406836964  | 1.0851184071293  |
| N21  | 3.4963780014551  | -0.9786973265821 | 0.7118658822926  |
| N22  | 0.9874676037100  | 0.8936915493484  | -2.1801668613533 |
| C23  | -0.1284449455939 | 1.5244534951461  | -1.7820149120880 |
| C24  | -0.8500300010666 | 2.3372210263148  | -2.6467187204979 |
| H25  | -1.7412535400739 | 2.8404745386000  | -2.2877126171299 |
| C26  | -0.4052956982652 | 2.4395348424114  | -3.9681011647200 |
| H27  | -0.9395857688955 | 3.0639041216285  | -4.6772498736541 |
| C28  | 0.6937826713125  | 1.6918201593883  | -4.3932861939569 |
| H29  | 0.9915943055995  | 1.7111398813811  | -5.4349544758487 |
| C30  | 1.3862835676369  | 0.9001741986207  | -3.4693794552867 |
| C31  | 2.4764461918041  | -0.0491672547657 | -3.7847792093323 |
| C32  | 3.0696167197539  | -0.1643919140927 | -5.0424042877245 |
| H33  | 2.7826768374047  | 0.4977428099059  | -5.8507479880619 |
| C34  | 4.0457121641435  | -1.1385524930215 | -5.2496814069386 |
| H35  | 4.5190659348660  | -1.2370269278532 | -6.2214526719680 |
| C36  | 4.4044508792418  | -1.9776418305135 | -4.1967283993190 |
| H37  | 5.1569517520255  | -2.7489024819562 | -4.3189829807184 |
| C38  | 3.7800652394011  | -1.8027747306319 | -2.9633030894897 |
| H39  | 4.0385823399164  | -2.4209290937785 | -2.1100442466260 |



|     |                  |                  |                  |
|-----|------------------|------------------|------------------|
| N40 | 2.8397518517027  | -0.8714971201383 | -2.7655289295033 |
| C41 | -0.5807385980501 | 1.1544923562010  | -0.4008239090484 |
| O43 | -1.4114423061719 | 1.7544360201209  | 0.2352143997897  |
| O44 | 3.6025871124212  | 0.9522816494511  | -1.1775365092274 |
| O45 | 1.9145886935399  | 1.3720357866911  | 0.7631268697292  |
| H46 | 1.1068813774304  | 0.8286389507591  | 2.0069637993888  |
| H47 | 2.7251246000210  | 1.9203449477793  | 0.8674075326468  |
| O49 | 4.2089088313622  | 2.9005007748031  | 1.0422199023629  |
| H50 | 4.4806921075276  | 3.3744909466694  | 0.2447337882024  |
| H51 | 4.2539182706255  | 3.5487116283728  | 1.7588621395824  |
| O51 | 0.3532087631891  | 0.2269388450416  | 2.3449103207215  |
| H53 | -0.3103185861838 | 0.7666057399244  | 2.8045368172692  |

**Figure S1t**

**E (M06/LACV3P\*\*++ 2f(Ru)) = -1576.1125944554**

**ZPE (kcal mol<sup>-1</sup>) = 255.136**

**G<sub>solv</sub> = -0.2244191**

**DH<sub>298</sub> (kcal mol<sup>-1</sup>) = 19.342**

**DS<sub>298</sub> (cal K<sup>-1</sup> mol<sup>-1</sup>) = 192.199**

Cartesian coordinates

| atom | x               | y                | z                |
|------|-----------------|------------------|------------------|
| O42  | 0.0000000000000 | 0.0000000000000  | 0.0000000000000  |
| H52  | 0.0000000000000 | 0.0000000000000  | 0.9931053769000  |
| Ru1  | 3.1938766838406 | 0.0000000000000  | -1.7220862815942 |
| N2   | 2.6522392785238 | -2.0267490112695 | -1.0719720574922 |
| C3   | 1.4400797747469 | -2.5848697047981 | -1.2289438799393 |
| H4   | 0.6916519323033 | -1.9817051930974 | -1.7267049516059 |
| C5   | 1.1535774737960 | -3.8600672562496 | -0.7541295625660 |
| H6   | 0.1642847681653 | -4.2802525634034 | -0.8971516788530 |
| C7   | 2.1574269684401 | -4.5677657266422 | -0.0942125973042 |
| H8   | 1.9693451916232 | -5.5652146762701 | 0.2903823068241  |
| C9   | 3.4108208792714 | -3.9825486405657 | 0.0717364312844  |
| H10  | 4.1946688700401 | -4.5233901244767 | 0.5868306671682  |
| C11  | 3.6406781801713 | -2.6993552784953 | -0.4286777320630 |
| C12  | 4.9313532463341 | -1.9883171556231 | -0.3134506069873 |
| C13  | 6.0585362511688 | -2.5130503172463 | 0.3229192121687  |
| H14  | 6.0241759524094 | -3.4940737277527 | 0.7798879513595  |
| C15  | 7.2324564921366 | -1.7632331637965 | 0.3728213984386  |
| H16  | 8.1121022086054 | -2.1619903815540 | 0.8680654591833  |
| C17  | 7.2631735056075 | -0.5011229027212 | -0.2187232551883 |
| H18  | 8.1568079931571 | 0.1130866467491  | -0.2038770215669 |
| C19  | 6.1138097070736 | -0.0262551196688 | -0.8398790039405 |
| H20  | 6.0756847423556 | 0.9450506086402  | -1.3207816260657 |
| N21  | 4.9827965066868 | -0.7538796986198 | -0.8841402165007 |

|     |                  |                  |                  |
|-----|------------------|------------------|------------------|
| N22 | 1.2939323241584  | 0.6205945421385  | -2.5473322068463 |
| C23 | 0.3471146115513  | 1.3373629138533  | -1.9045808265817 |
| C24 | -0.5868360891777 | 2.0996701619978  | -2.6035492711569 |
| H25 | -1.3069475830100 | 2.6900974250595  | -2.0481452153656 |
| C26 | -0.5810988532001 | 2.0661048261665  | -3.9958220811424 |
| H27 | -1.2954449717973 | 2.6537908085338  | -4.5635360578895 |
| C28 | 0.3326289343130  | 1.2458067725312  | -4.6532748164982 |
| H29 | 0.3233364193980  | 1.1843905851832  | -5.7340235657032 |
| C30 | 1.2690759813149  | 0.5272633330855  | -3.9067219475700 |
| C31 | 2.2467424361721  | -0.4056955901721 | -4.5180033332196 |
| C32 | 2.2257602066267  | -0.7637388422820 | -5.8687127923669 |
| H33 | 1.4890746036442  | -0.3438792546994 | -6.5415140431054 |
| C34 | 3.1609748924222  | -1.6777366822348 | -6.3509591954522 |
| H35 | 3.1550498717515  | -1.9579120890548 | -7.3995376330787 |
| C36 | 4.0980182088735  | -2.2256914455565 | -5.4760614711770 |
| H37 | 4.8428312552723  | -2.9370651695386 | -5.8149645145811 |
| C38 | 4.0684925657860  | -1.8323569460768 | -4.1427270770183 |
| H39 | 4.7827526432643  | -2.2148724939202 | -3.4224450677208 |
| N40 | 3.1660922358149  | -0.9532868838896 | -3.6817267583167 |
| C41 | 0.2016062553730  | 1.2560709460806  | -0.3983505716596 |
| O43 | 0.1527994571869  | 2.2418641147355  | 0.3071922232458  |
| O44 | 4.0797745571683  | 1.2452803300087  | -2.5373635867177 |
| O45 | 2.6678336621761  | 0.6558526680921  | -0.0618896745964 |
| H46 | 0.4029914608219  | 1.5223906817490  | 2.2511474059782  |
| H47 | 3.0868267409356  | 0.3214726202938  | 0.7929241901541  |
| O49 | 3.1918498825589  | -0.1777611997295 | 2.3338675218264  |
| H50 | 3.7777223009761  | 0.3065560338174  | 2.9312255135004  |
| H51 | 2.2803255728876  | 0.0318991675285  | 2.6293396831718  |
| O51 | 0.4979987286707  | 0.6115258054034  | 2.5917194741290  |
| H53 | -0.0839870718206 | 0.5396470655840  | 3.3621025203473  |

**Figure S1u**

**E (M06/LACV3P\*\*++ 2f(Ru)) = -1652.50737360353**

**ZPE (kcal mol<sup>-1</sup>) = 268.188**

**G<sub>solv</sub> = -0.223912**

**DH<sub>298</sub> (kcal mol<sup>-1</sup>) = 20.533**

**DS<sub>298</sub> (cal K<sup>-1</sup> mol<sup>-1</sup>) = 200.816**

Cartesian coordinates

| atom | x            | y             | z             |
|------|--------------|---------------|---------------|
| O42  | 0.1548433282 | 0.0142807059  | 0.0306113501  |
| H52  | 0.1410278071 | 0.0650399621  | 1.0253095501  |
| Ru1  | 3.1689394068 | -0.0441186526 | -1.7330100887 |
| N2   | 2.5838888313 | -2.0372582364 | -1.0177342901 |
| C3   | 1.3604097817 | -2.5848822794 | -1.1295560216 |
| H4   | 0.5996352806 | -1.9701600655 | -1.5926822272 |

|     |                |                |                |
|-----|----------------|----------------|----------------|
| C5  | 1. 0741328587  | -3. 8604807920 | -0. 6562936766 |
| H6  | 0. 0748911419  | -4. 2666998976 | -0. 7670234996 |
| C7  | 2. 0920321090  | -4. 5879616227 | -0. 0415943520 |
| H8  | 1. 9050535751  | -5. 5859343676 | 0. 3421472761  |
| C9  | 3. 3594361041  | -4. 0214879448 | 0. 0753326248  |
| H10 | 4. 1569504061  | -4. 5790002989 | 0. 5504489520  |
| C11 | 3. 5868041793  | -2. 7382173574 | -0. 4254480067 |
| C12 | 4. 8988005582  | -2. 0582316888 | -0. 3671237002 |
| C13 | 6. 0408068675  | -2. 6117195920 | 0. 2153854334  |
| H14 | 6. 0031015369  | -3. 5944070237 | 0. 6685831886  |
| C15 | 7. 2342815087  | -1. 8925494450 | 0. 2174540901  |
| H16 | 8. 1249391027  | -2. 3180390125 | 0. 6687321673  |
| C17 | 7. 2667701867  | -0. 6253568040 | -0. 3611920895 |
| H18 | 8. 1727218986  | -0. 0296283742 | -0. 3770010417 |
| C19 | 6. 1029373626  | -0. 1183349651 | -0. 9278662643 |
| H20 | 6. 0594826828  | 0. 8662610985  | -1. 3791813110 |
| N21 | 4. 9556051591  | -0. 8232512795 | -0. 9355112288 |
| N22 | 1. 2910215574  | 0. 5688039724  | -2. 5765936365 |
| C23 | 0. 3332505045  | 1. 2815004472  | -1. 9456278355 |
| C24 | -0. 6252293441 | 2. 0056375575  | -2. 6511997591 |
| H25 | -1. 3527986216 | 2. 5926700274  | -2. 1022973775 |
| C26 | -0. 6289458575 | 1. 9403288028  | -4. 0422171517 |
| H27 | -1. 3651363779 | 2. 4918473182  | -4. 6182277531 |
| C28 | 0. 3135601740  | 1. 1446377714  | -4. 6880564806 |
| H29 | 0. 3088885133  | 1. 0730736221  | -5. 7683518077 |
| C30 | 1. 2755001837  | 0. 4674561947  | -3. 9354077302 |
| C31 | 2. 3092112410  | -0. 4055884857 | -4. 5427715835 |
| C32 | 2. 3131830849  | -0. 7676957793 | -5. 8913920385 |
| H33 | 1. 5475726961  | -0. 4024380226 | -6. 5644123252 |
| C34 | 3. 3081286928  | -1. 6168383200 | -6. 3728527889 |
| H35 | 3. 3191759939  | -1. 9015281969 | -7. 4201194775 |
| C36 | 4. 2814058624  | -2. 0935631846 | -5. 4968672216 |
| H37 | 5. 0725685774  | -2. 7543061037 | -5. 8332437428 |
| C38 | 4. 2256387586  | -1. 6984265789 | -4. 1646291510 |
| H39 | 4. 9646336827  | -2. 0291200088 | -3. 4442375234 |
| N40 | 3. 2657570207  | -0. 8812724659 | -3. 7024434991 |
| C41 | 0. 2297023071  | 1. 2572399265  | -0. 4358479241 |
| 043 | 0. 1157113922  | 2. 2727884508  | 0. 2204103156  |
| 044 | 3. 9884683475  | 1. 4111326021  | -2. 3216055335 |
| 045 | 2. 8608382468  | 0. 9562027744  | -0. 0017100071 |
| H46 | 0. 3722968282  | 1. 6298072422  | 2. 2486217069  |
| H47 | 3. 1330497277  | 0. 5123458574  | 0. 8494949192  |
| 049 | 3. 1368700347  | -0. 1951011073 | 2. 3592528127  |
| H50 | 3. 7505401148  | 0. 1409242350  | 3. 0258714037  |

|     |               |              |               |
|-----|---------------|--------------|---------------|
| H51 | 2.2448001366  | 0.0660690591 | 2.6638943194  |
| O51 | 0.4707658144  | 0.7229143327 | 2.5958070950  |
| H53 | -0.1547451772 | 0.6348577263 | 3.3294348945  |
| O54 | 4.3243434333  | 2.6845681980 | -0.7633985408 |
| H55 | 3.8732537696  | 3.4050028992 | -1.2362577222 |
| H56 | 3.5616154044  | 1.9658340221 | -0.2585398799 |

**Figure S1v**

**E (M06/LACV3P\*\*++ 2f(Ru)) = -1652.54116364267**

**ZPE (kcal mol<sup>-1</sup>) = 272.127**

**G<sub>solv</sub> = -0.2214088**

**DH<sub>298</sub> (kcal mol<sup>-1</sup>) = 20.643**

**DS<sub>298</sub> (cal K<sup>-1</sup> mol<sup>-1</sup>) = 200.678**

Cartesian coordinates

| atom | x             | y             | z             |
|------|---------------|---------------|---------------|
| O42  | 0.2430545703  | -0.0133757049 | 0.0842135917  |
| H52  | 0.1560156114  | 0.0494775310  | 1.0727464016  |
| Ru1  | 3.1696714370  | -0.0768116725 | -1.7346532998 |
| N2   | 2.6160215516  | -2.0168755976 | -1.0328235468 |
| C3   | 1.3933589930  | -2.5648308890 | -1.1536088689 |
| H4   | 0.6432762796  | -1.9577688274 | -1.6419650922 |
| C5   | 1.0955525460  | -3.8306801939 | -0.6616713827 |
| H6   | 0.0961880126  | -4.2341273332 | -0.7812360950 |
| C7   | 2.1006323843  | -4.5534672803 | -0.0216443982 |
| H8   | 1.9040023383  | -5.5437296667 | 0.3767531297  |
| C9   | 3.3699174072  | -3.9924636216 | 0.0950072437  |
| H10  | 4.1622960359  | -4.5475720761 | 0.5816880661  |
| C11  | 3.6103526344  | -2.7186031671 | -0.4243118438 |
| C12  | 4.9299952298  | -2.0552650204 | -0.3915316465 |
| C13  | 6.0731882611  | -2.6218309968 | 0.1771921175  |
| H14  | 6.0250128848  | -3.5941628595 | 0.6516731811  |
| C15  | 7.2827324246  | -1.9327021927 | 0.1300834780  |
| H16  | 8.1758152032  | -2.3679677530 | 0.5670166042  |
| C17  | 7.3270897879  | -0.6835804536 | -0.4858531322 |
| H18  | 8.2474765513  | -0.1134562425 | -0.5484471939 |
| C19  | 6.1578211469  | -0.1636293312 | -1.0306963644 |
| H20  | 6.1319788388  | 0.8104684582  | -1.5031265408 |
| N21  | 4.9893785855  | -0.8311438061 | -0.9860136373 |
| N22  | 1.2775846501  | 0.5461636594  | -2.5436397081 |
| C23  | 0.3118955516  | 1.2468530348  | -1.9108873741 |
| C24  | -0.6602817010 | 1.9625205184  | -2.6064253480 |
| H25  | -1.3899908273 | 2.5390091353  | -2.0494942867 |
| C26  | -0.6743686495 | 1.9030138831  | -3.9979330699 |
| H27  | -1.4228034835 | 2.4455153854  | -4.5665387813 |

|     |               |               |               |
|-----|---------------|---------------|---------------|
| C28 | 0.2782316484  | 1.1274639263  | -4.6496946478 |
| H29 | 0.2732329490  | 1.0616305424  | -5.7304790008 |
| C30 | 1.2548876138  | 0.4628092009  | -3.9019761771 |
| C31 | 2.3084473751  | -0.3752966655 | -4.5149859863 |
| C32 | 2.3223612728  | -0.7327880515 | -5.8654099773 |
| H33 | 1.5464306994  | -0.3826502922 | -6.5347632565 |
| C34 | 3.3341855836  | -1.5571109126 | -6.3509765049 |
| H35 | 3.3516248927  | -1.8394369881 | -7.3987185946 |
| C36 | 4.3160779343  | -2.0141537949 | -5.4737400844 |
| H37 | 5.1210958869  | -2.6582943318 | -5.8096869745 |
| C38 | 4.2524848568  | -1.6252836097 | -4.1406975188 |
| H39 | 4.9976090337  | -1.9449583542 | -3.4227666047 |
| N40 | 3.2757997692  | -0.8282555119 | -3.6713479086 |
| C41 | 0.2089204473  | 1.2242871670  | -0.4053401278 |
| O43 | 0.0115528696  | 2.2321105270  | 0.2468785448  |
| O44 | 3.8339405124  | 1.5970919641  | -2.4561232033 |
| O45 | 2.9353480420  | 0.9962182149  | 0.1161288290  |
| H46 | 0.1161676629  | 1.6690548666  | 2.2422332185  |
| H47 | 3.0508179198  | 0.5927596979  | 1.0342783101  |
| O49 | 2.9252491219  | -0.0026350753 | 2.4927621671  |
| H50 | 3.5403514510  | 0.2775683631  | 3.1831363325  |
| H51 | 2.0303702952  | 0.2654592786  | 2.7899900862  |
| O51 | 0.2785174680  | 0.7958606342  | 2.6499850446  |
| H53 | -0.3807530819 | 0.6775759479  | 3.3486994743  |
| O54 | 4.5461243855  | 2.4027891143  | -1.5023698871 |
| H55 | 4.6131146295  | 3.2462831430  | -1.9844432091 |
| H56 | 3.5011480604  | 1.7834506510  | 0.0254611997  |

**Figure S1w**

**E (M06/LACV3P\*\*++ 2f(Ru)) = -1499.00599845474**

**ZPE (kcal mol<sup>-1</sup>) = 230.689**

**G<sub>solv</sub> = -0.227187**

**DH<sub>298</sub> (kcal mol<sup>-1</sup>) = 18.033**

**DS<sub>298</sub> (cal K<sup>-1</sup> mol<sup>-1</sup>) = 186.383**

Cartesian coordinates

| atom | x            | y             | z             |
|------|--------------|---------------|---------------|
| O42  | 0.1064689775 | 0.1535473579  | 0.0790322114  |
| H52  | 0.0020548306 | 0.2393645595  | 1.0954023613  |
| Ru1  | 3.1689235588 | -0.0009100473 | -1.6382018802 |
| N2   | 2.6651631858 | -2.0556613167 | -1.0618300434 |
| C3   | 1.4361077623 | -2.5897557255 | -1.1468506124 |
| H4   | 0.6644573423 | -1.9643412086 | -1.5777597924 |
| C5   | 1.1651552151 | -3.8704712342 | -0.6753593540 |
| H6   | 0.1620544529 | -4.2740244495 | -0.7571440248 |
| C7   | 2.2004503658 | -4.6031373890 | -0.0970979949 |

|     |                |                |                |
|-----|----------------|----------------|----------------|
| H8  | 2. 0233821864  | -5. 6046840330 | 0. 2822064998  |
| C9  | 3. 4709260074  | -4. 0366031082 | -0. 0001525667 |
| H10 | 4. 2782076091  | -4. 5943267536 | 0. 4587081030  |
| C11 | 3. 6849990842  | -2. 7474001281 | -0. 4900445701 |
| C12 | 4. 9837042852  | -2. 0440398838 | -0. 4269535895 |
| C13 | 6. 1462762979  | -2. 5870990894 | 0. 1213703240  |
| H14 | 6. 1399518890  | -3. 5861101164 | 0. 5397021122  |
| C15 | 7. 3210476598  | -1. 8351986866 | 0. 1363218688  |
| H16 | 8. 2259616348  | -2. 2514756398 | 0. 5677239607  |
| C17 | 7. 3194184321  | -0. 5502637516 | -0. 4034634102 |
| H18 | 8. 2110293874  | 0. 0669486198  | -0. 4093056308 |
| C19 | 6. 1369749873  | -0. 0537212451 | -0. 9398859878 |
| H20 | 6. 0692364056  | 0. 9396800919  | -1. 3695822748 |
| N21 | 5. 0088893760  | -0. 7871688042 | -0. 9497903799 |
| N22 | 1. 2869542237  | 0. 6122351409  | -2. 5400060778 |
| C23 | 0. 3534203388  | 1. 3709353821  | -1. 9232905209 |
| C24 | -0. 5603012415 | 2. 1352374747  | -2. 6485457969 |
| H25 | -1. 2610720634 | 2. 7600971141  | -2. 1066224652 |
| C26 | -0. 5518956301 | 2. 0656489491  | -4. 0367984246 |
| H27 | -1. 2514452363 | 2. 6511936893  | -4. 6248145048 |
| C28 | 0. 3577221558  | 1. 2180264822  | -4. 6653564233 |
| H29 | 0. 3609516582  | 1. 1367266372  | -5. 7447710443 |
| C30 | 1. 2794454647  | 0. 5026985620  | -3. 9012611892 |
| C31 | 2. 2640745791  | -0. 4260306593 | -4. 5006006934 |
| C32 | 2. 2554457359  | -0. 7918149820 | -5. 8502224039 |
| H33 | 1. 5147706247  | -0. 3890918130 | -6. 5293116720 |
| C34 | 3. 2077967806  | -1. 6930550995 | -6. 3217570021 |
| H35 | 3. 2116312037  | -1. 9810402931 | -7. 3682867413 |
| C36 | 4. 1491014888  | -2. 2192757482 | -5. 4376659907 |
| H37 | 4. 9067758376  | -2. 9215445383 | -5. 7672241272 |
| C38 | 4. 1028973521  | -1. 8200286764 | -4. 1066569469 |
| H39 | 4. 8173043205  | -2. 1936342997 | -3. 3820358644 |
| N40 | 3. 1836180588  | -0. 9520434576 | -3. 6550697674 |
| C41 | 0. 2138658510  | 1. 3775486020  | -0. 4138014908 |
| O43 | 0. 1280878582  | 2. 4192897824  | 0. 2010872729  |
| O44 | 4. 0032417602  | 1. 3173320831  | -2. 4269875513 |
| O45 | 2. 7647281796  | 0. 5222280397  | -0. 0259955567 |
| H46 | 0. 0044093820  | 1. 6346686864  | 2. 5268761219  |
| O51 | -0. 0282909343 | 0. 6666023758  | 2. 5851602413  |
| H53 | -0. 7717751058 | 0. 4529208383  | 3. 1655061408  |

**Figure S1x**

**E (M06/LACV3P\*\*++ 2f(Ru)) = -1422.23793552482**

**ZPE (kcal mol<sup>-1</sup>) = 206.666**

**G<sub>solv</sub> = -0.0932754**

**DH<sub>298</sub> (kcal mol<sup>-1</sup>)= 15.584**

**DS<sub>298</sub> (cal K<sup>-1</sup> mol<sup>-1</sup>)= 166.838**

Cartesian coordinates

| atom | x                | y                | z                |
|------|------------------|------------------|------------------|
| O42  | 0.000000000000   | 0.000000000000   | 0.000000000000   |
| Ru1  | 0.000000000000   | 0.000000000000   | 2.5526449436000  |
| N2   | 2.0665654439772  | 0.000000000000   | 1.8054266258788  |
| C3   | 2.5094822847868  | 0.8602027176879  | 0.8758775848849  |
| H4   | 1.7910462627269  | 1.5816251917550  | 0.5134763802898  |
| C5   | 3.8088874784897  | 0.7967287966875  | 0.3847507080485  |
| H6   | 4.1341244657792  | 1.5060582118880  | -0.3677714350371 |
| C7   | 4.6588129380139  | -0.1978323690148 | 0.8650957217063  |
| H8   | 5.6757953134180  | -0.2813908900425 | 0.4952981769419  |
| C9   | 4.1896082648911  | -1.0937320103996 | 1.8223679025304  |
| H10  | 4.8358229817717  | -1.8774117791424 | 2.1983129307130  |
| C11  | 2.8769344166659  | -0.9736653886341 | 2.2841966595140  |
| C12  | 2.2720519382309  | -1.8631390697593 | 3.2966326271656  |
| C13  | 2.9324472203039  | -2.9279860523952 | 3.9134494627959  |
| H14  | 3.9590899538291  | -3.1608810391044 | 3.6587788523785  |
| C15  | 2.2547083984547  | -3.6944558451204 | 4.8588461645714  |
| H16  | 2.7548860303883  | -4.5290006543284 | 5.3396936821263  |
| C17  | 0.9352162901923  | -3.3790706486594 | 5.1797799044713  |
| H18  | 0.3765105660368  | -3.9516619207882 | 5.9113643561721  |
| C19  | 0.3312531075808  | -2.3038172596424 | 4.5371072741423  |
| H20  | -0.6861029243530 | -1.9901370442749 | 4.7431631803419  |
| N21  | 0.9908364625654  | -1.5780880919222 | 3.6225775424220  |
| N22  | -0.9573038879075 | 1.7318301030246  | 1.7080648509179  |
| C23  | -1.5853198219708 | 1.6506573048895  | 0.5276259510803  |
| C24  | -2.5136736779604 | 2.6149314413092  | 0.1404012219891  |
| H25  | -3.0025227705244 | 2.4945488490156  | -0.8197332217070 |
| C26  | -2.7320135235115 | 3.7017172988534  | 0.9815915916705  |
| H27  | -3.4519838612425 | 4.4695063226850  | 0.7159082586383  |
| C28  | -1.9652850637067 | 3.8387610866686  | 2.1416479694177  |
| H29  | -2.0566385575565 | 4.7304819170560  | 2.7497804314619  |
| C30  | -1.0600272024978 | 2.8340989795069  | 2.4873457248941  |
| C31  | -0.0635071801324 | 2.9406758329215  | 3.5809252201927  |
| C32  | -0.0294555545010 | 3.9973088039034  | 4.4934413305563  |
| H33  | -0.7949518496916 | 4.7638344114813  | 4.4803561913595  |
| C34  | 0.9994636785776  | 4.0533917089189  | 5.4310505063347  |
| H35  | 1.0360184953247  | 4.8651364438974  | 6.1506514101466  |
| C36  | 1.9759666484692  | 3.0596988853828  | 5.4320047193711  |
| H37  | 2.7961330875315  | 3.0713611061401  | 6.1412067881872  |
| C38  | 1.8707128662366  | 2.0317563110743  | 4.4976156209426  |
| H39  | 2.5985312637893  | 1.2262292234325  | 4.4667212581137  |

|     |                  |                  |                  |
|-----|------------------|------------------|------------------|
| N40 | 0.8827432848766  | 1.9720982177852  | 3.5993415193839  |
| C41 | -1.0618884056799 | 0.5898831068005  | -0.4388128877283 |
| O43 | -1.5900866278006 | 0.4818064081075  | -1.5378038289528 |
| O44 | -0.9829354303410 | 0.2423787425593  | 3.9778037645285  |
| O45 | -0.8568049009207 | -1.3357389066380 | 1.7542144338199  |

**Figure S1y**

**E (M06/LACV3P\*\*++ 2f(Ru)) = -1422.28019385315**

**ZPE (kcal mol<sup>-1</sup>) = 207.325**

**G<sub>solv</sub> = -0.0761177**

**DH<sub>298</sub> (kcal mol<sup>-1</sup>) = 15.93**

**DS<sub>298</sub> (cal K<sup>-1</sup> mol<sup>-1</sup>) = 171.142**

Cartesian coordinates

| atom | x                | y                | z                |
|------|------------------|------------------|------------------|
| O42  | 0.0000000000000  | 0.0000000000000  | 0.0000000000000  |
| Ru1  | 0.0000000000000  | 0.0000000000000  | 2.0311991905000  |
| N2   | 2.1902711158980  | 0.0000000000000  | 1.4979342175763  |
| C3   | 2.9683520017762  | 1.0850327889635  | 1.4097558041396  |
| H4   | 2.5230118572821  | 2.0198755012068  | 1.7377693011345  |
| C5   | 4.2864521145192  | 0.9984664014690  | 0.9660222572137  |
| H6   | 4.8946409786801  | 1.8936970933164  | 0.8993120302897  |
| C7   | 4.7931524690621  | -0.2519594894000 | 0.6193495888021  |
| H8   | 5.8136341363372  | -0.3553719183299 | 0.2644428114901  |
| C9   | 3.9834019749241  | -1.3790949893153 | 0.7454640690790  |
| H10  | 4.3771455908843  | -2.3572011427139 | 0.4982948597968  |
| C11  | 2.6701886628491  | -1.2251872472859 | 1.1964855217553  |
| C12  | 1.7350493834259  | -2.3539511664005 | 1.4136633110117  |
| C13  | 2.0629346131978  | -3.6878715666868 | 1.1621059831206  |
| H14  | 3.0371264137697  | -3.9433985819948 | 0.7648262835483  |
| C15  | 1.1320719215017  | -4.6912228794249 | 1.4172122740702  |
| H16  | 1.3839555745804  | -5.7280022882616 | 1.2183137385691  |
| C17  | -0.1199649194950 | -4.3501770752431 | 1.9245232372552  |
| H18  | -0.8737769950959 | -5.1001578853436 | 2.1351015537915  |
| C19  | -0.4011289613349 | -3.0088158716121 | 2.1508201712231  |
| H20  | -1.3626726426467 | -2.6715484081392 | 2.5211865705182  |
| N21  | 0.5050020673828  | -2.0475922750594 | 1.9041982608622  |
| N22  | -0.4638700453673 | 2.0748073963775  | 1.6074940519265  |
| C23  | -0.8741739510634 | 2.1937598330017  | 0.3243450352478  |
| C24  | -1.5144026873790 | 3.3310433930844  | -0.1467351211949 |
| H25  | -1.8091014837637 | 3.3587502669640  | -1.1896514680013 |
| C26  | -1.7553070401610 | 4.3732605363054  | 0.7452271487328  |
| H27  | -2.2735643413972 | 5.2704851501473  | 0.4214603145283  |
| C28  | -1.2889345463944 | 4.2632760557200  | 2.0527237374265  |
| H29  | -1.4050947254392 | 5.0781160126390  | 2.7585498819422  |
| C30  | -0.6151925246599 | 3.1088011207602  | 2.4669968215259  |



|     |                  |                  |                  |
|-----|------------------|------------------|------------------|
| C31 | 0.0267115947258  | 3.0628183372002  | 3.8111852184176  |
| C32 | -0.7234946279732 | 3.2242262643048  | 4.9781269159017  |
| H33 | -1.8034037436463 | 3.3219327637901  | 4.9307693192662  |
| C34 | -0.0498294241150 | 3.2336265853787  | 6.1992723736159  |
| H35 | -0.5989395860176 | 3.3441258968199  | 7.1292150316901  |
| C36 | 1.3363873532787  | 3.0992982005652  | 6.2004117962292  |
| H37 | 1.9013643303445  | 3.1072270736066  | 7.1266654951233  |
| C38 | 1.9950365166712  | 2.9548209410648  | 4.9774657210310  |
| H39 | 3.0773497488706  | 2.8528284810234  | 4.9436736302374  |
| N40 | 1.3645849545188  | 2.9349831527835  | 3.7988732702231  |
| C41 | -0.5765105509911 | 1.0329402264094  | -0.5973660542936 |
| O43 | -0.8325581482569 | 1.0847525298832  | -1.7805792359932 |
| O44 | 0.6310596292925  | 0.2362482136036  | 3.6525358346264  |
| O45 | -1.7022033729456 | -0.3622091145858 | 2.2213201337112  |

**Figure S1z**

**E (M06/LACV3P\*\*++ 2f(Ru)) = -1498.65508574755**

**ZPE (kcal mol<sup>-1</sup>) = 219.974**

**G<sub>solv</sub> = -0.084671**

**DH<sub>298</sub> (kcal mol<sup>-1</sup>) = 17.054**

**DS<sub>298</sub> (cal K<sup>-1</sup> mol<sup>-1</sup>) = 179.333**

Cartesian coordinates

| atom | x             | y             | z             |
|------|---------------|---------------|---------------|
| O42  | -0.3138364167 | -0.0977225385 | 0.1087619444  |
| Ru1  | 0.2481618955  | 0.0476270472  | 2.0647596556  |
| N2   | 2.2780091406  | 0.1921795680  | 1.2523583755  |
| C3   | 2.9230719990  | 1.3346835448  | 0.9777813734  |
| H4   | 2.4331292312  | 2.2461888146  | 1.3021145584  |
| C5   | 4.1729018002  | 1.3364600635  | 0.3633830281  |
| H6   | 4.6670614348  | 2.2779496665  | 0.1514360861  |
| C7   | 4.7604599240  | 0.1168571110  | 0.0364674228  |
| H8   | 5.7313423789  | 0.0829646249  | -0.4473437180 |
| C9   | 4.0946859083  | -1.0679002064 | 0.3450844437  |
| H10  | 4.5475491358  | -2.0221816772 | 0.1073888185  |
| C11  | 2.8435322319  | -1.0042248154 | 0.9610337739  |
| C12  | 2.0622428982  | -2.1964081464 | 1.3554441829  |
| C13  | 2.4938770858  | -3.5101224743 | 1.1643853105  |
| H14  | 3.4483080245  | -3.7099712569 | 0.6943497226  |
| C15  | 1.6871855825  | -4.5668986560 | 1.5808025228  |
| H16  | 2.0160299759  | -5.5907143580 | 1.4345799356  |
| C17  | 0.4585649282  | -4.2967285382 | 2.1793285175  |
| H18  | -0.1997735222 | -5.0905333751 | 2.5132224950  |
| C19  | 0.0739924691  | -2.9715251781 | 2.3415079684  |
| H20  | -0.8767315431 | -2.6904229352 | 2.7786921709  |

|     |               |               |               |
|-----|---------------|---------------|---------------|
| N21 | 0.8622524671  | -1.9587962250 | 1.9455479791  |
| N22 | -0.4607665386 | 2.0635298354  | 1.6832643604  |
| C23 | -1.1625435031 | 2.0836461411  | 0.5261180767  |
| C24 | -1.9674354989 | 3.1567509526  | 0.1652827974  |
| H25 | -2.4929032813 | 3.0996515166  | -0.7810571758 |
| C26 | -2.0692049551 | 4.2372017250  | 1.0351819670  |
| H27 | -2.7027198156 | 5.0858611203  | 0.7964088945  |
| C28 | -1.3214734225 | 4.2259803571  | 2.2103534358  |
| H29 | -1.3352718840 | 5.0720423288  | 2.8882732784  |
| C30 | -0.5018683489 | 3.1344951550  | 2.5149819961  |
| C31 | 0.3769100625  | 3.1951348198  | 3.7170121376  |
| C32 | -0.1537506974 | 3.5122064179  | 4.9726594022  |
| H33 | -1.2213706646 | 3.6652802843  | 5.0974745323  |
| C34 | 0.7194821989  | 3.6191932049  | 6.0556261998  |
| H35 | 0.3421094996  | 3.8585577499  | 7.0453449409  |
| C36 | 2.0808055330  | 3.4162718455  | 5.8408799388  |
| H37 | 2.7965684171  | 3.4934432469  | 6.6525266217  |
| C38 | 2.5125170535  | 3.1138701499  | 4.5478115475  |
| H39 | 3.5693117721  | 2.9570542890  | 4.3438271439  |
| N40 | 1.6882596628  | 3.0044977664  | 3.5010114819  |
| C41 | -1.0364561176 | 0.8792302646  | -0.3927061016 |
| O43 | -1.5634371717 | 0.8920408570  | -1.4864150283 |
| O44 | 0.8162848252  | 0.2940436832  | 3.7476185483  |
| O45 | -1.4285474823 | -0.4351762709 | 2.7210967234  |
| O46 | -0.6064127871 | -0.4670115020 | 4.9729674589  |
| H47 | -1.2272517330 | -0.4288942105 | 3.8563104734  |
| H48 | -0.6010344851 | 0.3930707337  | 5.4245059420  |

**Figure S1A**

**E (M06/LACV3P\*\*++ 2f(Ru)) = -1498.6893422336**

**ZPE (kcal mol<sup>-1</sup>) = 223.565**

**G<sub>solv</sub> = -0.0849466**

**DH<sub>298</sub> (kcal mol<sup>-1</sup>) = 17.393**

**DS<sub>298</sub> (cal K<sup>-1</sup> mol<sup>-1</sup>) = 180.981**

Cartesian coordinates

| atom | x             | y             | z             |
|------|---------------|---------------|---------------|
| O42  | -0.4261083418 | -0.2232294958 | 0.2063545518  |
| Ru1  | 0.2075940864  | 0.0385193441  | 2.1094436346  |
| N2   | 2.2193942360  | 0.1918336963  | 1.3117865930  |
| C3   | 2.8655114227  | 1.3426806627  | 1.0654999040  |
| H4   | 2.3836448702  | 2.2438156534  | 1.4278157029  |
| C5   | 4.1065100101  | 1.3629429899  | 0.4347594561  |
| H6   | 4.5966954318  | 2.3114381676  | 0.2454660662  |
| C7   | 4.6907808899  | 0.1550652401  | 0.0624182551  |
| H8   | 5.6553628299  | 0.1369830872  | -0.4349793050 |

|     |                |                |                |
|-----|----------------|----------------|----------------|
| C9  | 4. 0288648141  | -1. 0382057182 | 0. 3446714637  |
| H10 | 4. 4789146617  | -1. 9853320717 | 0. 0750676405  |
| C11 | 2. 7843134823  | -0. 9949201753 | 0. 9754182795  |
| C12 | 2. 0036544881  | -2. 1954329647 | 1. 3389392205  |
| C13 | 2. 4047841321  | -3. 5021297230 | 1. 0584663397  |
| H14 | 3. 3386021961  | -3. 6894133358 | 0. 5432091473  |
| C15 | 1. 5890702554  | -4. 5667962163 | 1. 4332095191  |
| H16 | 1. 8904846298  | -5. 5858334810 | 1. 2131271133  |
| C17 | 0. 3836871068  | -4. 3055270382 | 2. 0799917281  |
| H18 | -0. 2857128817 | -5. 1043209291 | 2. 3782798648  |
| C19 | 0. 0317084812  | -2. 9842570999 | 2. 3319500601  |
| H20 | -0. 9033103732 | -2. 7051053048 | 2. 8011691185  |
| N21 | 0. 8297538491  | -1. 9638424855 | 1. 9788965685  |
| N22 | -0. 4378361384 | 2. 0537455492  | 1. 6666227610  |
| C23 | -1. 0919326561 | 2. 0507011519  | 0. 4785342296  |
| C24 | -1. 8342795359 | 3. 1370438960  | 0. 0329701561  |
| H25 | -2. 3152357667 | 3. 0578335308  | -0. 9352150219 |
| C26 | -1. 9341286790 | 4. 2585418464  | 0. 8491312974  |
| H27 | -2. 5211237395 | 5. 1190466505  | 0. 5431473136  |
| C28 | -1. 2439707205 | 4. 2701365185  | 2. 0588922716  |
| H29 | -1. 2592517249 | 5. 1432588438  | 2. 7014947773  |
| C30 | -0. 4778712415 | 3. 1654497713  | 2. 4432990899  |
| C31 | 0. 3542051210  | 3. 2546953303  | 3. 6759251549  |
| C32 | -0. 2170552068 | 3. 6178234855  | 4. 8999407441  |
| H33 | -1. 2878954700 | 3. 7743698698  | 4. 9825707210  |
| C34 | 0. 6187332525  | 3. 7591160390  | 6. 0066290968  |
| H35 | 0. 2088559929  | 4. 0358388239  | 6. 9733701518  |
| C36 | 1. 9862816241  | 3. 5430006697  | 5. 8464635803  |
| H37 | 2. 6750524939  | 3. 6512626269  | 6. 6779289856  |
| C38 | 2. 4598904344  | 3. 1909750379  | 4. 5814580908  |
| H39 | 3. 5221740977  | 3. 0224623680  | 4. 4180577774  |
| N40 | 1. 6699544604  | 3. 0490289393  | 3. 5123658058  |
| C41 | -0. 9920943069 | 0. 8042196696  | -0. 3837390623 |
| O43 | -1. 4198087312 | 0. 8185299534  | -1. 5216132597 |
| O44 | 0. 7899578997  | 0. 3506868431  | 3. 9525519251  |
| O45 | -1. 5052348886 | -0. 4922018592 | 2. 7838140865  |
| O46 | 0. 4290477598  | -0. 7402756559 | 4. 8044357626  |
| H47 | -1. 5131381864 | -0. 3685799472 | 3. 7509858692  |
| H48 | 0. 7193627644  | -0. 3986134718 | 5. 6678733760  |

**Figure S1B**

**E (M06/LACV3P\*\*++ 2f(Ru)) = -1422.23880131319**

**ZPE (kcal mol<sup>-1</sup>) = 206.878**

**G<sub>solv</sub> = -0.0770534**

**DH<sub>298</sub> (kcal mol<sup>-1</sup>) = 16.026**

**DS<sub>298</sub> (cal K<sup>-1</sup> mol<sup>-1</sup>)= 171.538**

Cartesian coordinates

| atom | x             | y             | z             |
|------|---------------|---------------|---------------|
| O42  | -1.7395298447 | -0.1056099928 | 2.3052635310  |
| Ru1  | 0.1322509879  | 0.0709106260  | 1.8145580965  |
| N2   | 2.4166945712  | -0.3220486146 | 1.4686172572  |
| C3   | 3.3982224182  | 0.5785467287  | 1.3794477323  |
| H4   | 3.1049041741  | 1.6187196345  | 1.4534519236  |
| C5   | 4.7320894786  | 0.2143369669  | 1.2074115715  |
| H6   | 5.4993338064  | 0.9775967216  | 1.1390904270  |
| C7   | 5.0442919474  | -1.1405081393 | 1.1318487228  |
| H8   | 6.0703699710  | -1.4677318471 | 0.9967239439  |
| C9   | 4.0227720462  | -2.0787109389 | 1.2517795536  |
| H10  | 4.2584372585  | -3.1353084364 | 1.2252994187  |
| C11  | 2.7058432242  | -1.6396074743 | 1.4292242554  |
| C12  | 1.5721268835  | -2.5686909877 | 1.6459287042  |
| C13  | 1.7003700990  | -3.9588850290 | 1.5928629625  |
| H14  | 2.6505074737  | -4.4094442489 | 1.3360031071  |
| C15  | 0.6029674062  | -4.7702795622 | 1.8680646104  |
| H16  | 0.7015238490  | -5.8503065581 | 1.8245516694  |
| C17  | -0.6137115678 | -4.1798507804 | 2.1994999568  |
| H18  | -1.4926471654 | -4.7718671948 | 2.4277332291  |
| C19  | -0.6949712763 | -2.7928066136 | 2.2257780246  |
| H20  | -1.6144214613 | -2.2686745057 | 2.4591491468  |
| N21  | 0.3687088193  | -2.0168238745 | 1.9511476257  |
| N22  | -0.5421896919 | 2.1556875473  | 1.6522539866  |
| C23  | -1.7187106378 | 2.2782897256  | 2.3005168110  |
| C24  | -2.2982105699 | 3.5055437758  | 2.5932511621  |
| H25  | -3.2478530895 | 3.5183727006  | 3.1160341816  |
| C26  | -1.6309450448 | 4.6593074940  | 2.1919616520  |
| H27  | -2.0378084860 | 5.6414550093  | 2.4105351097  |
| C28  | -0.4548757595 | 4.5306290107  | 1.4601357519  |
| H29  | 0.0455174265  | 5.4058446433  | 1.0622320386  |
| C30  | 0.0695794529  | 3.2610007596  | 1.1778715676  |
| C31  | 1.2276510348  | 3.1323921664  | 0.2528512398  |
| C32  | 2.2974812305  | 4.0389000928  | 0.2757625384  |
| H33  | 2.3587979802  | 4.8063770600  | 1.0405487732  |
| C34  | 3.2872707709  | 3.9207334143  | -0.6998833733 |
| H35  | 4.1277396936  | 4.6081071917  | -0.7117982171 |
| C36  | 3.1805859794  | 2.9102096442  | -1.6548750847 |
| H37  | 3.9238462735  | 2.7929805950  | -2.4367274047 |
| C38  | 2.0881373153  | 2.0412721050  | -1.5859919256 |
| H39  | 1.9655879621  | 1.2288420827  | -2.2977893117 |
| N40  | 1.1362202248  | 2.1574567706  | -0.6602092475 |

|     |               |               |               |
|-----|---------------|---------------|---------------|
| C41 | -2.4262326316 | 1.0003637433  | 2.6424872956  |
| O43 | -3.5225513698 | 0.9642770039  | 3.1446281070  |
| O44 | 0.8962879889  | 0.5295421510  | 3.3612910335  |
| O45 | 0.2626147332  | -0.0810813128 | -0.0107347636 |

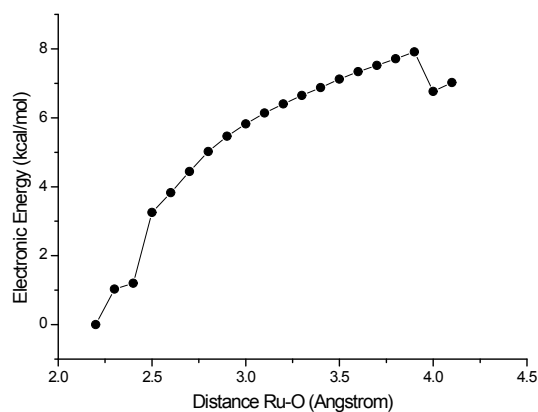

Figure S2. Scan result of dissociation of oxygen  $\mathbf{9}_{\text{end-on}}$  [(bpc)(bpy)Ru<sup>IV</sup>OO]<sup>+</sup>. The electronic energies were obtained using Becke's three-parameter hybrid functional and the LYP correlation functional (B3LYP) together with the LACVP\*\* core potential and basis set.

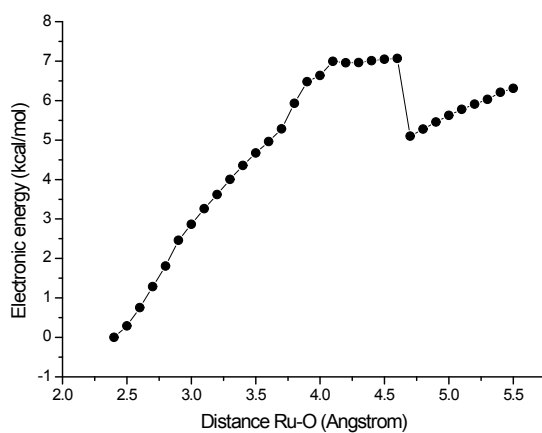

Figure S3. Scan result of dissociation of oxygen  $\mathbf{12}_{\text{end-on}}$  [(bpc)(bpy)Ru<sup>V</sup>OO]<sup>+</sup>. The electronic energies were obtained using Becke's three-parameter hybrid functional and the LYP correlation functional (B3LYP) together with the LACVP\*\* core potential and basis set.
